# Supplementary material for: De novo Assembly of a 40 Mb Eukaryotic Genome from Short Sequence Reads: Sordaria macrospora, a Model Organism for Fungal Morphogenesis
Source: PubMed Central journal article supplement (PMC2851567; doi:10.1371/journal.pgen.1000891), 2010-04-08
Supplement: pgen.1000891.s028.pdf [file pgen.1000891.s028.pdf]

**Table S16.** *S. macrospora* homologs of conidiation-related genes from different ascomycetes. Genes in this table are either involved in or differentially regulated during conidiation in *A. nidulans* or *N. crassa*.

| locus tag  | conidiation-related gene <sup>1</sup> | characteristics / remarks                                                               | e-value |
|------------|---------------------------------------|-----------------------------------------------------------------------------------------|---------|
| SMAC_04005 | <i>flbD</i>                           | Myb-DNA-binding protein                                                                 | 9e-30   |
| SMAC_05750 | <i>abaA</i>                           | regulatory protein AbaA                                                                 | 4e-11   |
| SMAC_02716 | <i>wetA</i>                           | regulatory protein WetA                                                                 | 4e-17   |
| SMAC_04536 | <i>con-6</i> (NCU08769)               | conidiation-specific expression                                                         | 2e-25   |
| SMAC_02743 | related to <i>con-6</i> (NCU01064)    | related to conidiation protein CON-6                                                    | 3e-26   |
| SMAC_04887 | <i>con-8</i> (NCU10977)               | conidiation- specific expression                                                        | 2e-23   |
| SMAC_03018 | <i>con-10</i> (NCU07325)              | conidiation-specific expression                                                         | 3e-36   |
| SMAC_03017 | <i>con-13</i> (NCU07324)              | conidiation-specific expression                                                         | e-140   |
| SMAC_01244 | <i>al-1</i> (NCU00552)                | phytoene dehydrogenase AL-1 (carotenoid biosynthesis, Conidiation- specific expression) | 0.0     |
| SMAC_01277 | <i>al-2</i> (NCU00585)                | geranylgeranyl-diphosphate geranylgeranyltransferase, Conidiation- specific expression  | 0.0     |
| SMAC_06570 | <i>al-3</i> (NCU20300)                | farnesyltransferase                                                                     | 0.0     |
| SMAC_00047 | <i>fl, fluffy, acon-1</i> (NCU08726)  | C6-zinc finger TF, regulator of conidiation                                             | 0.0     |
| SMAC_08071 | <i>fr</i> (NCU07483)                  | frost, cell division control protein 1                                                  | 0.0     |
| SMAC_04302 | <i>csp-1</i> (NCU02713))              | conidial septation                                                                      | e-152   |
| SMAC_03705 | <i>frq</i> (NCU02265)                 | frequency, clock protein FRQ                                                            | 0.0     |
| SMAC_06136 | <i>vivid</i> (NCU20238)               | blue light receptor                                                                     | 2e-98   |
| SMAC_03527 | <i>wc-1</i> (NCU02356)                | zinc finger protein white collar-1, blue light receptor                                 | 0.0     |
| SMAC_00185 | <i>wc-2</i> (NCU00902)                | zinc finger protein white collar-2                                                      | 0.0     |
| SMAC_02423 | <i>ve-1</i> (NCU01731)                | velvet, blue light receptor                                                             | 0.0     |
| SMAC_06025 | <i>nop-1</i> (NCU10055)               | opsin, green light receptor                                                             | e-143   |
| SMAC_02601 | <i>cgg-1, grg-1</i> (NCU03753)        | GRG-1 glucose-repressible gene-1 protein                                                | 5e-33   |
| SMAC_00022 | <i>cgg-2, eas, bli-7</i> (NCU08457)   | hydrophobin, rodlet protein                                                             | 2e-023  |
| SMAC_05970 | <i>cgg-4</i> (NCU02500)               | pheromone precursor, (clock-controlled gene-4)                                          | e-135   |
| SMAC_06579 | <i>cgg-6</i> (NCU01418)               | clock-controlled gene 6                                                                 | 5e-60   |
| SMAC_05057 | <i>cgg-8</i> (NCU09686)               | clock-controlled gene-8                                                                 | e-152   |
| SMAC_05699 | <i>cgg-9</i> (NCU10053)               | trehalose synthase (clock-controlled gene 9)                                            | 0.0     |
| SMAC_05106 | <i>cgg-13</i> (NCU08907)              | clock-controlled gene 13                                                                | 3e-67   |
| SMAC_05542 | <i>cgg-15</i> (NCU08936)              | clock-controlled gene 15, related to sporulation-specific gene SPS2                     | 0.0     |
| SMAC_00802 | <i>bli-3</i> (NCU20927)               | BLI-3 blue-light-inducible Bli-3 protein                                                | e-116   |
| SMAC_09428 | <i>bli-4</i> (NCU08699)               | BLI-4 putative oxidoreductase bli-4, mitochondrial                                      | e-179   |
| SMAC_07111 | <i>rco-1</i> (NCU06205)               | transcriptional repressor similar to <i>S. cerevisiae</i> TUP1                          | 0.0     |
| SMAC_04199 | <i>rcm-1</i> (NCU06842)               | regulator of conidia morphology, general transcriptional corepressor ssn6               | 0.0     |
| SMAC_06671 | <i>ro-2</i> (NCU111773)               | ropy-2, dynactin arp1 p62 subunit RO-2                                                  | 0.0     |
| SMAC_04005 | <i>rca-1</i> (NCU01312)               | regulator of conidiation, Myb-like DNA-binding                                          | e-179   |

|            |                         |                                    |       |
|------------|-------------------------|------------------------------------|-------|
|            |                         | protein myb-1                      |       |
| SMAC_05781 | <i>rco-3</i> (NCU02582) | glucose transporter                | 0.0   |
| SMAC_07195 | <i>gna-3</i> (NCU05206) | G-protein alpha subunit            | 0.0   |
| SMAC_06822 | <i>rrg-1</i> (NCU01895) | response regulator                 | 0.0   |
| SMAC_00003 | <i>hst-2</i> (NCU21250) | heat shock transcription factor    | e-110 |
| SMAC_04557 | <i>cat-1</i> (NCU08791) | Catalase 1                         | 0.0   |
| SMAC_06468 | <i>cat-3</i> (NCU00355) | Catalase 3                         | 0.0   |
| SMAC_05035 | <i>sod-1</i> (NCU02133) | SOD-1 superoxide dismutase [Cu-Zn] | 9e-83 |

---

<sup>†</sup>the first three genes (*flbD*, *abaA*, *wetA*) are from *A. nidulans*, all others from *N. crassa*. There are no homologs to the *A. nidulans* conidiation gene *brlA* present in *S. macrospora* or *N. crassa*, and no clear orthologs to the *A. nidulans* conidiation gene *flbC*.
