# Supplementary material for: De novo Assembly of a 40 Mb Eukaryotic Genome from Short Sequence Reads: Sordaria macrospora, a Model Organism for Fungal Morphogenesis
Source: PubMed Central journal article supplement (PMC2851567; doi:10.1371/journal.pgen.1000891), 2010-04-08
Supplement: pgen.1000891.s030.pdf [file pgen.1000891.s030.pdf]

**Table S18.** Predicted polyketide synthases (PKS), non-ribosomal peptide synthases (NRPS) and fatty acid synthases (FAS). The *S. macrospora* genome contains three *nrps* genes, three *fas* genes, and seven *pks* genes all of which have a clear ortholog in *N. crassa* (first three parts of the table). In addition, *S. macrospora* has three additional *pks* genes and one *pks/nrps* hybrid gene for which no ortholog is present in *N. crassa* (last part of the table).

| locus_tag  | Scaffold     | N.c. ortholog | Best BLASTP hit in non-redundant database (NCBI) |                                                                                | enzyme                                    |
|------------|--------------|---------------|--------------------------------------------------|--------------------------------------------------------------------------------|-------------------------------------------|
|            |              |               | acc. no.                                         | protein name and organism                                                      |                                           |
| SMAC_07745 | scaffold_65  | NCU07119.2    | ref XP_960302.1                                  | hypothetical protein NCU07119 [ <i>Neurospora crassa</i> OR74A]                | NRPS                                      |
| SMAC_06097 | scaffold_21  | NCU04531.2    | ref XP_956942.2                                  | hypothetical protein NCU04531 [ <i>Neurospora crassa</i> OR74A]                | NRPS                                      |
| SMAC_09348 | scaffold_138 | NCU08441.2    | emb CAD70509.1                                   | related to AM-toxin synthetase (AMT) [ <i>Neurospora crassa</i> ]              | NRPS                                      |
| SMAC_00841 | scaffold_17  | NCU07308.2    | ref XP_962466.1                                  | fatty acid synthase alpha subunit reductase [ <i>Neurospora crassa</i> OR74A]  | FAS                                       |
| SMAC_00840 | scaffold_17  | NCU07307.2    | ref XP_962465.1                                  | fatty acid synthase beta subunit dehydratase [ <i>Neurospora crassa</i> OR74A] | FAS                                       |
| SMAC_00143 | scaffold_7   | NCU00056.2    | ref XP_955799.1                                  | 3-oxoacyl-[acyl-carrier-protein]-synthase [ <i>Neurospora crassa</i> OR74A]    | 3-oxoacyl-[acyl-carrier-protein]-synthase |
| SMAC_03437 | scaffold_2   | NCU04801.2    | pdb 3E1H_A                                       | type III polyketide synthase [ <i>Neurospora crassa</i> ]                      | type III PKS                              |
| SMAC_03130 | scaffold_20  | NCU03584.2    | emb CAM35471.1                                   | polyketide synthase [ <i>Sordaria macrospora</i> ]                             | type I PKS, non-reducing                  |
| SMAC_00527 | scaffold_7   | NCU02918.2    | ref XP_965600.1                                  | hypothetical protein NCU02918 [ <i>Neurospora crassa</i> OR74A]                | type I PKS, reducing                      |
| SMAC_09261 | scaffold_117 | NCU04865.2    | ref XP_959122.1                                  | hypothetical protein NCU04865 [ <i>Neurospora crassa</i> OR74A]                | type I PKS, reducing                      |
| SMAC_07685 | scaffold_13  | NCU05011.2    | ref XP_955938.1                                  | hypothetical protein NCU05011 [ <i>Neurospora crassa</i> OR74A]                | type I PKS, reducing                      |
| SMAC_07941 | scaffold_15  | NCU06013.2    | ref XP_958135.2                                  | hypothetical protein NCU06013 [ <i>Neurospora crassa</i> OR74A]                | type I PKS, reducing                      |
| SMAC_05695 | scaffold_30  | NCU08399.2    | ref XP_963238.1                                  | hypothetical protein NCU08399 [ <i>Neurospora crassa</i> OR74A]                | type I PKS, reducing                      |
| SMAC_06009 | scaffold_11  | none          | gb AAR92212.1                                    | polyketide synthase [ <i>Gibberella moniliformis</i> ]                         | type I PKS, reducing                      |
| SMAC_01198 | scaffold_17  | none          | ref XP_001274946.1                               | polyketide synthase, putative [ <i>Aspergillus clavatus</i> NRRL 1]            | hybrid PKS/NRPS                           |
| SMAC_01188 | scaffold_17  | none          | ref XP_001273596.1                               | polyketide synthase, putative [ <i>Aspergillus clavatus</i> NRRL 1]            | type I PKS, reducing                      |
| SMAC_09000 | scaffold_106 | none          | ref XP_001806097.1                               | hypothetical protein SNOG_15965 [ <i>Phaeosphaeria nodorum</i> SN15]           | type I PKS, reducing                      |
