# Supplementary material for: De novo Assembly of a 40 Mb Eukaryotic Genome from Short Sequence Reads: Sordaria macrospora, a Model Organism for Fungal Morphogenesis
Source: PLOS journal article supplement (doi:10.1371/journal.pgen.1000891), 2010-04-08
Supplement: S24 (10.1371/journal.pgen.1000891.s024) [file journal.pgen.1000891.s024]

**Table S12.** *S. macrospora* homologs of genes involved in calcium signaling

| locus_tag  | N.c. ortholog | Best BlastP hit in non-redundant database |                           | (putative) function                                      |
|------------|---------------|-------------------------------------------|---------------------------|----------------------------------------------------------|
|            |               | acc. no.                                  | organism <sup>1</sup>     |                                                          |
| SMAC_00176 | NCU09212      | XP_959156                                 |                           | Ca <sup>2+</sup> / CaM dependent protein kinase          |
| SMAC_00194 | NCU00916      | CAE81985                                  |                           | Ca <sup>2+</sup> /Na <sup>+</sup> exchanger              |
| SMAC_00614 | NCU02826      | XP_963783                                 |                           | Ca <sup>2+</sup> /Na <sup>+</sup> exchanger              |
| SMAC_00692 | NCU09871      | XP_960153                                 |                           | Ca <sup>2+</sup> and/or CaM binding protein              |
| SMAC_00983 | NCU06366      | XP_962400                                 |                           | Ca <sup>2+</sup> /H <sup>+</sup> exchanger               |
| SMAC_01000 | NCU06347      | XP_962381                                 |                           | Ca <sup>2+</sup> and/or CaM binding protein              |
| SMAC_01765 | NCU04379      | XP_957456                                 |                           | Ca <sup>2+</sup> and/or CaM binding protein              |
| SMAC_02320 | NCU01564      | XP_956201.1                               |                           | Ca <sup>2+</sup> dependent mitochondrial carrier protein |
| SMAC_02598 | NCU03750      | XP_961097                                 |                           | Ca <sup>2+</sup> and/or CaM binding protein              |
| SMAC_02648 | NCU03804      | Q05681                                    |                           | calcineurin A-1                                          |
| SMAC_02674 | NCU03833      | P87072                                    |                           | calcineurin B-1                                          |
| SMAC_03383 | NCU04736      | XP_960371.2                               |                           | Calcium P-type ATPase                                    |
| SMAC_03602 | NCU08147      | CAB65297                                  |                           | Calcium P-type ATPase                                    |
| SMAC_03870 | NCU07075      | XP_960340                                 |                           | Ca <sup>2+</sup> /H <sup>+</sup> exchanger               |
| SMAC_03941 | NCU01241      | XP_961607.1                               |                           | mitochondrial carrier protein                            |
| SMAC_03962 | NCU01266      | CAE76127.1                                |                           | phospholipase C                                          |
| SMAC_04124 | NCU05360      | XP_963351                                 |                           | Ca <sup>2+</sup> /H <sup>+</sup> exchanger               |
| SMAC_04252 | NCU02762      | XP_963732                                 |                           | Calcium channel subunit Cch1                             |
| SMAC_04280 | NCU02738      | XP_965123                                 |                           | Ca <sup>2+</sup> binding protein PEF-1                   |
| SMAC_04466 | NCU04120      | XP_382067                                 | <i>Gibberella zeae</i>    | calmodulin                                               |
| SMAC_04567 | NCU03292      | XP_964218                                 |                           | Calcium P-type ATPase                                    |
| SMAC_04583 | NCU03305      | CAB65295                                  |                           | Calcium P-type ATPase                                    |
| SMAC_04619 | NCU09123      | XP_958895                                 |                           | Ca <sup>2+</sup> / CaM dependent protein kinase          |
| SMAC_04743 | NCU06617      | XP_364625                                 | <i>Magnaporthe grisea</i> | Ca <sup>2+</sup> binding myosin regulatory light chain   |
| SMAC_04807 | NCU07711      | XP_962297                                 |                           | Ca <sup>2+</sup> /H <sup>+</sup> exchanger               |
| SMAC_04852 | NCU09265      | CAE76316                                  |                           | calreticulin                                             |
| SMAC_05010 | NCU02115      | XP_963852                                 |                           | Ca <sup>2+</sup> and/or CaM binding protein              |
| SMAC_05273 | NCU02175      | XP_964245                                 |                           | phospholipase C                                          |
| SMAC_05352 | NCU06177      | XP_962989                                 |                           | Ca <sup>2+</sup> and/or CaM binding protein              |
| SMAC_06270 | NCU08490      | XP_963419.1                               |                           | Ca <sup>2+</sup> /Na <sup>+</sup> exchanger              |
| SMAC_06559 | NCU06650      | XP_960883                                 |                           | phospholipase A2                                         |
| SMAC_06632 | NCU06703      | XP_961018                                 |                           | Ca channel subunit Mid1                                  |
| SMAC_07075 | NCU06245      | AAZ23805                                  |                           | phospholipase C                                          |
| SMAC_07176 | NCU05225      | XP_961885                                 |                           | Ca-dep. mitochondrial NADH dehydrogenase                 |
| SMAC_07478 | NCU06948      | XP_958218                                 |                           | Ca <sup>2+</sup> and/or CaM binding protein              |
| SMAC_08401 | NCU04898      | XP_958407                                 |                           | cation-transporting ATPase 4                             |
| SMAC_08578 | NCU07966      | XP_962099                                 |                           | Cation-ATPase                                            |
| SMAC_08748 | NCU02283      | XP_959927                                 |                           | Ca <sup>2+</sup> / CaM dependent protein kinase          |
| SMAC_08979 | NCU05154      | XP_956652                                 |                           | Calcium P-type ATPase                                    |

<sup>1</sup>organism name is given only if best hit is not a *N. crassa* protein
