# Supplementary material for: De novo Assembly of a 40 Mb Eukaryotic Genome from Short Sequence Reads: Sordaria macrospora, a Model Organism for Fungal Morphogenesis
Source: PLoS Genet. 2010 Apr 8;6(4):e1000891. doi: 10.1371/journal.pgen.1000891 (PMC2851567; doi:10.1371/journal.pgen.1000891)
Supplement: Table S9 — Genome integrity genes. (0.35 MB XLS) [file pgen.1000891.s021.xls]

## Sheet: Pfam
Locus	pfam domain	Explanation	Similarity	N. crassa gene
SMAC_00331	Ada3	Histone acetyltransferases subunit 3	4e-90
SMAC_08608	ASF1_hist_chap	ASF1 like histone chaperone	4.5e-105
SMAC_02357	AT_hook	AT hook motif	3.9e-07
SMAC_03216	AT_hook	AT hook motif	3e-16
SMAC_03356	AT_hook	AT hook motif	1.4e-10
SMAC_05461	AT_hook	AT hook motif	3.4e-06
SMAC_06781	AT_hook	AT hook motif	2.8e-11
SMAC_02166	CBFD_NFYB_HMF	Histone-like transcription factor (CBF/	4.3e-13
SMAC_02803	CBFD_NFYB_HMF	Histone-like transcription factor (CBF/	9.9e-12
SMAC_04862	CBFD_NFYB_HMF	Histone-like transcription factor (CBF/	6.5e-38
SMAC_05461	CBFD_NFYB_HMF	Histone-like transcription factor (CBF/	7.1e-14
SMAC_08084	CBFD_NFYB_HMF	Histone-like transcription factor (CBF/	2.3e-21
SMAC_01060	Chromo	'chromo' (CHRromatin Organisation MOdifier)	1.7e-12
SMAC_01419	Chromo	'chromo' (CHRromatin Organisation MOdifier)	3.3e-10
SMAC_01634	Chromo	'chromo' (CHRromatin Organisation MOdifier)	7.9e-17
SMAC_02791	Chromo	'chromo' (CHRromatin Organisation MOdifier	1.4e-32
SMAC_06192	Chromo	'chromo' (CHRromatin Organisation MOdifier)	2.6e-12	hpo
SMAC_06208	Chromo	'chromo' (CHRromatin Organisation MOdifier)	7e-07
SMAC_09589	Chromo	'chromo' (CHRromatin Organisation MOdifier)	6.5e-12
SMAC_09809	Chromo	'chromo' (CHRromatin Organisation MOdifier)	6.9e-18
SMAC_09985	Chromo	'chromo' (CHRromatin Organisation MOdifier)	3.3e-11
SMAC_02428	CHZ	Histone chaperone domain CHZ	5e-18
SMAC_00826	CRC_subunit	Chromatin remodelling complex subunit	6.3e-95
SMAC_02795	CRC_subunit	Chromatin remodelling complex subunit	1.1e-90
SMAC_00447	Cullin	Cullin family	6e-57
SMAC_05971	Cullin	Cullin family	2.1e-147
SMAC_06684	Cullin	Cullin family	7.2e-124
SMAC_07196	Cullin	Cullin family	0
SMAC_05971	Cullin_Nedd8	Cullin protein neddylation domain	2.3e-39
SMAC_06684	Cullin_Nedd8	Cullin protein neddylation domain	1.2e-36
SMAC_07196	Cullin_Nedd8	Cullin protein neddylation domain	1.4e-36
SMAC_01708	DASH_Ask1	DASH complex subunit Ask1	8.3e-40
SMAC_08279	DASH_Dad1	DASH complex subunit Dad1	4.7e-15
SMAC_02517	DASH_Dad2	DASH complex subunit Dad2	1.5e-32
SMAC_02483	DASH_Dad3	DASH complex subunit Dad3	2.9e-32
SMAC_05914	DASH_Dam1	DASH complex subunit Dam1	4e-31
SMAC_03375	DASH_Duo1	DASH complex subunit Duo1	5.4e-42
SMAC_05235	DASH_Hsk3	DASH complex subunit Hsk3 like	3.5e-15
SMAC_08496	DASH_Spc19	Spc19	3.8e-12
SMAC_03661	DASH_Spc34	DASH complex subunit Spc34	1e-92
SMAC_00083	DOT1	Histone methylation protein DOT1	1.3e-123
SMAC_08850	EST1	Telomerase activating protein Est1	1.8e-44
SMAC_06627	Hap2_elong	Histone acetylation protein 2	6.4e-107
SMAC_08892	Hat1_N	Histone acetyl transferase HAT1 N-terminus	7.2e-64
SMAC_05784	HDAC_interact	Histone deacetylase (HDAC) interacting	1.9e-68
SMAC_01503	Hist_deacetyl	Histone deacetylase domain	1.3e-101	hda-3
SMAC_04812	Hist_deacetyl	Histone deacetylase domain	1.4e-69	hda-2
SMAC_07369	Hist_deacetyl	Histone deacetylase domain	1.4e-60	had-4
SMAC_02363	Histone	Core histone H2A/H2B/H3/H4	1.5e-36	H3
SMAC_02364	Histone	Core histone H2A/H2B/H3/H4	4.4e-17	H4
SMAC_04116	Histone	Core histone H2A/H2B/H3/H4	3.8e-25	H2Az
SMAC_05286	Histone	Core histone H2A/H2B/H3/H4	4.4e-17	H4.1
SMAC_08084	Histone	Core histone H2A/H2B/H3/H4	9.6e-09	am alpha binding protein-1
SMAC_08323	Histone	Core histone H2A/H2B/H3/H4	4.7e-26	H2B
SMAC_08324	Histone	Core histone H2A/H2B/H3/H4	1.3e-31	H2A
SMAC_05931	HPC2	Histone promoter control 2 (HPC2)	6.6e-09
SMAC_02314	JmjC	JmjC domain	1.8e-06
SMAC_03938	JmjC	JmjC domain	3.7e-64
SMAC_05417	JmjC	JmjC domain	2.5e-12
SMAC_07239	JmjC	JmjC domain	4.7e-48
SMAC_03938	JmjN	jmjN domain	4.6e-15
SMAC_07239	JmjN	jmjN domain	9e-17
SMAC_02247	KTI12	Chromatin associated protein KTI12	5.6e-78
SMAC_00378	Mad3_BUB1_I	Mad3/BUB1 homology region 1	1e-64
SMAC_08883	Mis12	Mis12 protein	1.9e-74
SMAC_04033	Mis12_component	Mis12-Mtw1 protein family	1.6e-47
SMAC_04455	Mis6	Mis6	4.3e-255
SMAC_00664	Myb_DNA-bind_2	Rap1 Myb domain	3.2e-42
SMAC_04564	NuA4	Histone acetyltransferase subunit NuA4	1.2e-42
SMAC_07345	Pre-SET	Pre-SET motif	5.2e-08
SMAC_02353	PRMT5	PRMT5 arginine-N-methyltransferase	0
SMAC_02295	Rtt106	Histone chaperone Rttp106-like	5.2e-51
SMAC_03231	Rtt106	Histone chaperone Rttp106-like	8.7e-16
SMAC_03589	Rtt106	Histone chaperone Rttp106-like	1.1e-52
SMAC_08128	Rxt3	Histone deacetylation protein Rxt3	2.1e-58
SMAC_01755	SET	SET domain	1.7e-06
SMAC_05080	SET	SET domain	3.4e-06
SMAC_05383	SET	SET domain	2.3e-38
SMAC_05417	SET	SET domain	2e-07
SMAC_06115	SET	SET domain	5e-38
SMAC_06401	SET	SET domain	1.3e-13
SMAC_06682	SET	SET domain	3.4e-49
SMAC_06707	SET	SET domain	7.9e-06
SMAC_07345	SET	SET domain	5.5e-31	dim-5
SMAC_07534	SET	SET domain	8.3e-53
SMAC_08061	SET	SET domain	2.1e-34
SMAC_01219	SIR2	Sir2 family	1.1e-66	nst-2
SMAC_02226	SIR2	Sir2 family	7.1e-15	nst-4
SMAC_02788	SIR2	Sir2 family	1.6e-11	nst-3
SMAC_07002	SIR2	Sir2 family	2.4e-12
SMAC_09256	SIR2	Sir2 family	2.4e-10	nst-5
SMAC_01043	SNF2_N	SNF2 family N-terminal domain	1.2e-110
SMAC_01316	SNF2_N	SNF2 family N-terminal domain	3e-54
SMAC_01745	SNF2_N	SNF2 family N-terminal domain	2.5e-46
SMAC_01819	SNF2_N	SNF2 family N-terminal domain	4.7e-14
SMAC_02000	SNF2_N	SNF2 family N-terminal domain	5.7e-131
SMAC_02114	SNF2_N	SNF2 family N-terminal domain	2.2e-114
SMAC_02527	SNF2_N	SNF2 family N-terminal domain	2e-78
SMAC_02529	SNF2_N	SNF2 family N-terminal domain	2.2e-11
SMAC_02791	SNF2_N	SNF2 family N-terminal domain	1.3e-109
SMAC_03412	SNF2_N	SNF2 family N-terminal domain	9.2e-49
SMAC_03537	SNF2_N	SNF2 family N-terminal domain	8.5e-127
SMAC_04371	SNF2_N	SNF2 family N-terminal domain	4.3e-59
SMAC_04602	SNF2_N	SNF2 family N-terminal domain	2e-76
SMAC_05100	SNF2_N	SNF2 family N-terminal domain	1.9e-105
SMAC_05323	SNF2_N	SNF2 family N-terminal domain	1e-149
SMAC_05363	SNF2_N	SNF2 family N-terminal domain	6.4e-51
SMAC_06298	SNF2_N	SNF2 family N-terminal domain	2.5e-148
SMAC_07864	SNF2_N	SNF2 family N-terminal domain	4.2e-42
SMAC_09284	SNF2_N	SNF2 family N-terminal domain	8.1e-115
SMAC_01678	Spc24	Spc24 subunit of Ndc80	3.2e-23
SMAC_02835	Spc7	Spc7 kinetochore protein	2.3e-187
SMAC_01821	Spindle_Spc25	Chromosome segregation protein (Spc25,	1.9e-25
SMAC_02724	Swi5	Swi5	1.9e-44
SMAC_03646	SWIB	SWIB/MDM2 domain	3.2e-24
SMAC_07805	SWIB	SWIB/MDM2 domain	4.2e-07
SMAC_03948	Telo_bind	Telomere-binding protein alpha subunit, cen	3.4e-35
SMAC_05821	Telomere_reg-2	Telomere length regulation protein	1.2e-68
SMAC_05479		hhh-1
SMAC_03688		dim-2

## Sheet: List
Sordaria #	Neurospora	Description	Homologs	Gene Name	Protein name	Protein #	Sordaria #	scaffold/contig	e-value blastp	e-value blastx	e-value blastx	best hit acc. no.	best hit name
SMAC_00026	NCU08435	rrp-3		rrp-3			SMAC_00026	scaffold_7	Expect = 0.0	Expect = 0.0	Expect = 0.0	sp|Q7XM31	RecName: Full=Probable RNA-dependent RNA polymerase 2; Short=OsRDR2	Expect = 8e-073
SMAC_00082	NCU06264			mus-53			SMAC_00082	scaffold_7	Expect = 0.0	Expect = 0.0	Expect = 0.0	sp|Q10327	RecName: Full=Uncharacterized protein C32A11.02c	Expect = 2e-082
SMAC_00083	NCU06266	DOT1 homolog		dot-1	DOT-1		SMAC_00083	scaffold_7	Expect = 0.0	Expect = 0.0	Expect(2) = 0.0	sp|Q7SB74	RecName: Full=Histone-lysine N-methyltransferase, H3 lysine-79	Expect = 0.0
SMAC_00134	NCU00043	PPP-1					SMAC_00134	scaffold_7	Expect = 0.0	Expect = 0.0	Expect(2) = e-167	sp|Q9UW86	RecName: Full=Serine/threonine-protein phosphatase PP1	Expect = 0.0
SMAC_00164	NCU00077	ku80		mus-52			SMAC_00164	scaffold_7	Expect = 0.0	Expect = 0.0	Expect(4) = 0.0	sp|Q7RX73	RecName: Full=ATP-dependent DNA helicase II subunit 2; AltName:	Expect = 0.0
SMAC_00218	no locus assigned	histone acetyltransferase GNAT		ngf-1	NGF-1		SMAC_00218	scaffold_7	Expect = 0.0	Expect = 0.0	Expect = 0.0	sp|Q8WZM0	RecName: Full=Histone acetyltransferase GCN5	Expect = e-144
SMAC_00255	NCU00978		Mps1p			XP_325158.1	SMAC_00255	scaffold_7	Expect = 0.0	Expect = 0.0	Expect = 0.0	sp|P54199	RecName: Full=Serine/threonine-protein kinase MPS1; AltName:
SMAC_00257	NCU00980	putative AT-hook protein					SMAC_00257	scaffold_7	Expect = e-180	Expect = 0.0	Expect = 0.0	sp|P06843	RecName: Full=Protein SPT2; AltName: Full=Negative regulator of Ty	Expect = 3e-011
SMAC_00304	NCU07358	ATPase		mus/uvs?	RAD5-3		SMAC_00304	scaffold_7	Expect = 0.0	Expect = 0.0	Expect(3) = 0.0	sp|O60177	RecName: Full=Uncharacterized ATP-dependent helicase C23E6.02	Expect = 8e-014
SMAC_00349	NCU07400		Bik1p			XP_327686.1	SMAC_00349	scaffold_7	Expect = 0.0	Expect = 0.0	Expect = 0.0	sp|P28023	RecName: Full=Dynactin subunit 1; AltName: Full=150 kDa
SMAC_00378	NCU10043		Bub1p/Mad3			XP_323162.1	SMAC_00378	scaffold_7	Expect = 0.0	Expect = 0.0	Expect = 0.0	sp|P41695	RecName: Full=Checkpoint serine/threonine-protein kinase BUB1
SMAC_00422	NCU03040	8-oxoguanine glycosylase					SMAC_00422	scaffold_7	Expect = 0.0	Expect = 0.0	Expect = 0.0	sp|O70249	RecName: Full=N-glycosylase/DNA lyase; Includes: RecName:	Expect = 7e-056
SMAC_00571	NCU02913	ATPase		mus/uvs?	RAD5-7		SMAC_00571	scaffold_7	Expect = e-165	Expect = e-159	Expect(2) = e-153	sp|P36607	RecName: Full=DNA repair protein rad5	Expect = 8e-039
SMAC_00615	NCU02819	high mobility group (HMG) proteins					SMAC_00615	scaffold_7	Expect = 0.0	Expect = 0.0	Expect = 0.0	sp|O04235	RecName: Full=FACT complex subunit SSRP1; AltName: Full=Facilitates	Expect = 5e-014
SMAC_00634	NCU02814	DLK/ZIP		prd-4			SMAC_00634	scaffold_7	Expect = 0.0	Expect = 0.0	Expect(2) = 0.0	sp|P34101	RecName: Full=Probable serine/threonine-protein kinase fhkC;	Expect = 5e-077
SMAC_00664	NCU04079	RAP-1-like		rap-1			SMAC_00664	scaffold_17	Expect = 0.0	Expect = 0.0	Expect = 0.0	sp|Q9UPS6	RecName: Full=Histone-lysine N-methyltransferase SETD1B; AltName:	Expect = 6e-017
SMAC_00874	NCU07679	SMC2		smc-2			SMAC_00874	scaffold_17	Expect = 0.0	Expect = 0.0	Expect = 0.0	sp|P41003	RecName: Full=Structural maintenance of chromosomes protein 2;	Expect = 0.0
SMAC_00927	NCU08290	ku70		mus-51			SMAC_00927	scaffold_17	Expect = 0.0	Expect = 0.0	Expect = 0.0	sp|Q7SA95	RecName: Full=ATP-dependent DNA helicase II subunit 1; AltName:	Expect = 0.0
SMAC_00946	NCU08270	dcl-1		sms-3			SMAC_00946	scaffold_17	Expect = 0.0	Expect = 0.0	Expect = 0.0	sp|Q7S8J7	RecName: Full=Dicer-like protein 1; Includes: RecName:	Expect = 0.0
SMAC_00948	NCU08268	PP2A subunit					SMAC_00948	scaffold_17	Expect = 0.0	Expect = 0.0	Expect = 0.0	sp|Q9Y7T1	RecName: Full=Uncharacterized protein C63.05	Expect = 3e-037
SMAC_01032	NCU06318						SMAC_01032	scaffold_17	Expect = 0.0	Expect = 0.0	Expect = 0.0	sp|Q14562	RecName: Full=ATP-dependent RNA helicase DHX8; AltName: Full=DEAH box	Expect = 0.0
SMAC_01043	NCU06306	ATPase		crf5-1	CRF5-1		SMAC_01043	scaffold_17	Expect = 0.0	Expect = 0.0	Expect = 0.0	sp|Q9NRZ9	RecName: Full=Lymphoid-specific helicase; AltName:	Expect = 5e-073
SMAC_01115	NCU07496	SET protein		set-7	SET-7		SMAC_01115	scaffold_17			Expect = 5e-23	No hits found
SMAC_01162	NCU04445	ATPase		mus/uvs?	RAD5-6		SMAC_01162	scaffold_17	Expect = 2e-30	Expect = 2e-31	Expect = 7e-38	sp|O60177	RecName: Full=Uncharacterized ATP-dependent helicase C23E6.02	Expect = 2e-016
SMAC_01182	NCU04428		Mad1p			XP_323781.1	SMAC_01182	scaffold_17	Expect = 0.0	Expect = 0.0	Expect = 0.0	sp|Q6C452	RecName: Full=Spindle assembly checkpoint component MAD1; AltName:
SMAC_01219	NCU00523	sirtuin (SIR2-related histone deacetylases)		nst-2	NST-2		SMAC_01219	scaffold_4	Expect = e-180	Expect = 0.0	Expect(3) = 0.0	sp|P43619	RecName: Full=Nicotinate-nucleotide pyrophosphorylase	Expect = 4e-087
SMAC_01316	NCU00631	ATPase		crf9-1	CRF9-1		SMAC_01316	scaffold_4	Expect = 0.0	Expect = 0.0	Expect = 0.0	sp|O60177	RecName: Full=Uncharacterized ATP-dependent helicase C23E6.02	Expect = e-125
SMAC_01339	NCU00658	ZIP1					SMAC_01339	scaffold_4	Expect = 0.0	Expect = 0.0	Expect = 0.0	sp|Q14789	RecName: Full=Golgin subfamily B member 1; AltName: Full=Giantin;	Expect = e-104
SMAC_01419	NCU00738	chromodomain		cdp-2	CDP-2		SMAC_01419	scaffold_4	Expect = 0.0	Expect = 0.0	Expect = 0.0	No hits found
SMAC_01503	NCU00824	histone deacetylase RPD3		hda-3	HDA-3		SMAC_01503	scaffold_4	Expect = 0.0	Expect = 0.0	Expect(4) = 0.0	sp|P32561	RecName: Full=Histone deacetylase RPD3; AltName:	Expect = 0.0
SMAC_01629	NCU08357	chromatin assembly complex protein 2		cac-2	CAC-2		SMAC_01629	scaffold_4	Expect = 0.0	Expect = 0.0	Expect(3) = 0.0	sp|O13985	RecName: Full=Uncharacterized WD repeat-containing protein C26H5.03	Expect = 3e-078
SMAC_01634	NCU11326	chromodomain		cdp-1	CDP-1		SMAC_01634	scaffold_4	Expect = e-117			sp|P12036	RecName: Full=Neurofilament heavy polypeptide; Short=NF-H; AltName:
SMAC_01678	NCU05312		Spc24p			XP_324669.1	SMAC_01678	scaffold_29	Expect = 4e-59	Expect = 6e-72	Expect = 2e-66	sp|Q7S8M2	RecName: Full=Probable kinetochore protein spc-24
SMAC_01708	NCU05280		Ask1p			EAA32681.1	SMAC_01708	scaffold_29	Expect = 0.0	Expect = 0.0	Expect = e-145	sp|Q9P6S5	RecName: Full=DASH complex subunit ask1; AltName: Full=Outer
SMAC_01719	NCU04424	ATPase		mus/uvs?	RAD5-5		SMAC_01719	scaffold_29	Expect = 4e-60	Expect(2) = 2e-60	Expect = 6e-97	sp|Q9FF61	RecName: Full=Putative SWI/SNF-related matrix-associated	Expect = 1e-024
SMAC_01734	NCU05250	AT-hook protein					SMAC_01734	scaffold_29	Expect = 0.0	Expect = 0.0	Expect = 0.0	sp|Q00333	RecName: Full=Protein rad9; AltName: Full=SCC2 homolog	Expect = 3e-085
SMAC_01745	NCU05246	ATPase		mus/uvs?	RAD5-4		SMAC_01745	scaffold_29	Expect = 0.0	Expect = 0.0	Expect = 0.0	sp|Q9FF61	RecName: Full=Putative SWI/SNF-related matrix-associated	Expect = 6e-090
SMAC_01755	NCU04389	SET protein		set-4	SET-4		SMAC_01755	scaffold_29	Expect = 0.0	Expect = 0.0	Expect = 0.0	sp|Q3UG20	RecName: Full=Histone-lysine N-methyltransferase MLL5; AltName:	Expect = 3e-027
SMAC_01819	NCU07975	ATPase		mus/uvs?	RAD5-2		SMAC_01819	scaffold_29	Expect = 0.0	Expect = 0.0	Expect(4) = 0.0	sp|Q9FF61	RecName: Full=Putative SWI/SNF-related matrix-associated	Expect = 3e-075
SMAC_01944	NCU08991		Skp1p			XP_331383.1	SMAC_01944	scaffold_29	Expect = 1e-96	Expect = 5e-96	Expect = 3e-86	sp|Q9Y709	RecName: Full=Suppressor of kinetochore protein 1; AltName:
SMAC_01954	NCU08999		Cbf1p			XP_331391.1	SMAC_01954	scaffold_29	Expect = e-165	Expect = e-174	Expect(2) = e-168	sp|Q10186	RecName: Full=Uncharacterized bHLH domain-containing protein
SMAC_01954	NCU08999	Sc Cbf1					SMAC_01954	scaffold_29	Expect = e-165			sp|Q10186	RecName: Full=Uncharacterized bHLH domain-containing protein
SMAC_01981	NCU07571		Nnf1p/Nnf1R			XP_327857.1	SMAC_01981	scaffold_29	Expect = 2e-88	Expect = e-119	Expect = 9e-58	sp|O77033	RecName: Full=General transcriptional corepressor trfA
SMAC_01999	NCU07554	SMC3		smc-3			SMAC_01999	scaffold_29	Expect = 0.0	Expect = 0.0	Expect = 0.0	sp|Q00737	RecName: Full=Chromosome segregation protein sudA; AltName:	Expect = 0.0
SMAC_02000	NCU07556	ATPase		crf8-1	CRF8-1		SMAC_02000	scaffold_29	Expect = 0.0	Expect = 0.0	Expect = 0.0	sp|O43065	RecName: Full=Probable helicase mot1; AltName: Full=TBP-associated	Expect = 0.0
SMAC_02019	NCU07534	qde-1		qde-1			SMAC_02019	scaffold_29	Expect = 0.0	Expect = 0.0	Expect = 0.0	sp|Q8LHH9	RecName: Full=Probable RNA-dependent RNA polymerase SHL2; AltName:	Expect = 3e-019
SMAC_02114	NCU07837	ATPase		csb	RAD26-1		SMAC_02114	scaffold_16	Expect = 0.0	Expect = 0.0	Expect = 0.0	sp|Q9UR24	RecName: Full=DNA repair protein rhp26; AltName: Full=RAD26 homolog	Expect = 0.0
SMAC_02166	NCU06405	histone-like nuclear protein, DR1-like					SMAC_02166	scaffold_16	Expect = e-103	Expect = e-149	Expect = e-149	sp|Q6C6M5	RecName: Full=DNA polymerase epsilon subunit C; Short=DNA	Expect = 1e-021
SMAC_02183	NCU06419	chromodomain (annotation wrong)		cdp-5			SMAC_02183	scaffold_16	Expect = 0.0	Expect = 0.0	Expect(3) = 0.0	sp|P32490	RecName: Full=MAP kinase kinase MKK1/SSP32	Expect = 3e-091
SMAC_02224	NCU00205	ESP1, BimB, Cut1		esp-1			SMAC_02224	scaffold_16	Expect = 0.0	Expect = 0.0	Expect = 0.0	sp|P33144	RecName: Full=Separin; AltName: Full=Separase; AltName: Full=Cell	Expect = 0.0
SMAC_02226	NCU00203	sirtuin (SIR2-related histone deacetylases)		nst-4	NST-4		SMAC_02226	scaffold_16	Expect = e-127	Expect = e-134	Expect = e-134	sp|Q89EA6	RecName: Full=NAD-dependent deacetylase 2; AltName: Full=Regulatory	Expect = 4e-039
SMAC_02263	NCU00164	ITC-1		crf4-2	CRF4-2		SMAC_02263	scaffold_16	Expect = 0.0	Expect = 0.0	Expect = 0.0	sp|P53125	RecName: Full=Imitation switch two complex protein 1	Expect = 3e-038
SMAC_02279	NCU00145	histone H3 variant (CSE4, Cnp1, CENP-A, CID)	Cse4p/CENP-A	hH3v	CenH3	XP_322231.1	SMAC_02279	scaffold_16	No hits found	No hits found	Expect = 2e-37	sp|Q7RXR3	RecName: Full=Histone H3-like centromeric protein cse-4; AltName:	Expect = 5e-012
SMAC_02353	NCU01613			pp-2/prmt-5	PP-2/PRMT-5		SMAC_02353	scaffold_14	Expect = 0.0	Expect = 0.0	Expect = 0.0	sp|P78963	RecName: Full=Protein arginine N-methyltransferase skb1; AltName:	Expect = e-108
SMAC_02354	NCU01612	PRP16					SMAC_02354	scaffold_14	Expect = 0.0	Expect = 0.0	Expect = 0.0	sp|O42945	RecName: Full=Probable pre-mRNA-splicing factor ATP-dependent RNA	Expect = 0.0
SMAC_02363	NCU01635	histone H3		hH3	H3		SMAC_02363	scaffold_14	Expect = 4e-75	Expect = 2e-71	Expect = 2e-67	sp|P07041	RecName: Full=Histone H3	Expect = 2e-070
SMAC_02364	NCU01634	histone H4		hH4-1	H4-1		SMAC_02364	scaffold_14	Expect = 8e-53	Expect = 1e-54	Expect(2) = 3e-46	sp|P04914	RecName: Full=Histone H4
SMAC_02391	NCU01669	carm, e-32		prmt-3	PRMT-3		SMAC_02391	scaffold_14	Expect = 0.0	Expect = 0.0	Expect(2) = 0.0	sp|O13648	RecName: Full=Ribosomal protein arginine N-methytransferase rmt3	Expect = 1e-094
SMAC_02447	NCU01762	Ribonuclease III-like					SMAC_02447	scaffold_14	Expect = e-179	Expect = e-174	Expect = e-174	sp|Q02555	RecName: Full=Ribonuclease 3; AltName: Full=Ribonuclease III;	Expect = 3e-018
SMAC_02483	NCU01799		Dad3p			EAA27241.1	SMAC_02483	scaffold_14	Expect = 4e-33	Expect = 6e-40	Expect = 5e-41	sp|Q6CKH5	RecName: Full=DASH complex subunit DAD3; AltName: Full=Outer
SMAC_02517	NCU01841		Dad2p			XP_328280.1	SMAC_02517	scaffold_14	Expect = 1e-60	Expect = 1e-63	Expect = 7e-42	sp|Q6BV14	RecName: Full=DASH complex subunit DAD2; AltName: Full=Outer
SMAC_02527	NCU03650	ATPase		mus/uvs?	RAD16-2		SMAC_02527	scaffold_6	Expect = 0.0	Expect = 0.0	Expect(2) = 0.0	sp|P31244	RecName: Full=DNA repair protein RAD16; AltName: Full=ATP-dependent	Expect = 0.0
SMAC_02529	NCU03652	ATPase		mus/uvs?	RAD16-1		SMAC_02529	scaffold_6	Expect = 0.0	Expect = 0.0	Expect(2) = 0.0	sp|Q9UTL9	RecName: Full=Uncharacterized ATP-dependent helicase C144.05	Expect = e-139
SMAC_02618	NCU03769	NAP domain		nap-2	NAP-2		SMAC_02618	scaffold_6	Expect = e-140	Expect = e-175	Expect(3) = e-164	sp|Q9HGN2	RecName: Full=Putative nucleosome assembly protein C36B7.08c	Expect = 8e-025
SMAC_02633	NCU03786	PP2A, reg. subunit B class					SMAC_02633	scaffold_6	Expect = 0.0	Expect = 0.0	Expect(4) = 0.0	sp|Q14738	RecName: Full=Serine/threonine-protein phosphatase 2A 56 kDa	Expect = e-161
SMAC_02677	NCU03837	Gal83		NCU03837.1			SMAC_02677	scaffold_6	Expect = 0.0	Expect = 0.0	Expect(3) = 0.0	sp|Q04739	RecName: Full=SNF1 protein kinase subunit beta-3; AltName:	Expect = 6e-027
SMAC_02693	NCU11272		Fta4			XP_326498.1	SMAC_02693	scaffold_6
SMAC_02751	NCU04583	acetyltransferase GNAT					SMAC_02751	scaffold_6	Expect = e-104	Expect = e-106	Expect = e-106	sp|P94482	RecName: Full=Uncharacterized N-acetyltransferase ynaD	Expect = 1e-007
SMAC_02788	NCU03059	sirtuin (SIR2-related histone deacetylases)		nst-3	NST-3		SMAC_02788	scaffold_31	Expect = 0.0	Expect = 0.0	Expect = 0.0	sp|Q9UR39	RecName: Full=NAD-dependent deacetylase hst4; AltName:	Expect = 8e-065
SMAC_02791	NCU03060	ATPase with chromodomains		crf6-1	CRF6-1		SMAC_02791	scaffold_31	Expect = 0.0	Expect = 0.0	Expect = 0.0	sp|O14139	RecName: Full=Chromodomain helicase hrp3; AltName: Full=ATP-dependent	Expect = 0.0
SMAC_02800	NCU03070	HOX box					SMAC_02800	scaffold_31	Expect = 0.0	Expect = 0.0	Expect(2) = 0.0	sp|O54751	RecName: Full=Cone-rod homeobox protein	Expect = 7e-009
SMAC_02803	NCU03073	DNA POL II subunit					SMAC_02803	scaffold_31	Expect = 3e-98	Expect = e-157	Expect = 4e-91	sp|Q6BIP4	RecName: Full=DNA polymerase epsilon subunit D; Short=DNA	Expect = 3e-015
SMAC_02835	NCU03103		Spc105p			XP_330539.1	SMAC_02835	scaffold_31	Expect = 0.0	Expect = 0.0	Expect(2) = 0.0	sp|O59757	RecName: Full=Kinetochore protein spc7; AltName: Full=NMS complex
SMAC_02908	NCU03187	nim-A		nim-1NCU03187.1	NIM-1		SMAC_02908	scaffold_31	Expect = 0.0	Expect = 0.0	Expect = 0.0	sp|P48479	RecName: Full=G2-specific protein kinase nim-1	Expect = 0.0
SMAC_02983	NCU03266	HOX box					SMAC_02983	scaffold_31	Expect = 0.0	Expect = 0.0	Expect = 0.0	sp|Q566X8	RecName: Full=Diencephalon/mesencephalon homeobox protein 1-B	Expect = 5e-009
SMAC_03124	NCU03593	microconidiogenesis		kal-1			SMAC_03124	scaffold_20	Expect = 0.0	Expect = 0.0	Expect(3) = 0.0	sp|Q99160	RecName: Full=Homeobox protein HOY1	Expect = 1e-014
SMAC_03192	NCU01118		Sgt1p			CAB88599.2	SMAC_03192	scaffold_20	Expect = 0.0	Expect = 0.0	Expect = 0.0	sp|Q08446	RecName: Full=Protein SGT1; AltName: Full=Suppressor of G2 allele
SMAC_03214	NCU01143	most homeless-like RNA helicase A					SMAC_03214	scaffold_20	Expect = 0.0	Expect = 0.0	Expect = 0.0	sp|O94536	RecName: Full=Putative ATP-dependent RNA helicase ucp12	Expect = 0.0
SMAC_03216	NCU01145	AT-hook protein		ath-1	ATH-1		SMAC_03216	scaffold_20	Expect = 1e-52	Expect = 4e-77	Expect = 2e-67	sp|O08550	RecName: Full=Histone-lysine N-methyltransferase MLL4; AltName:	Expect = 8e-013
SMAC_03249	NCU05530	chromodomain		cdp-4			SMAC_03249	scaffold_2	Expect = 1e-26	Expect = 2e-71	Expect = 3e-40	sp|Q8T6B4	RecName: Full=ABC transporter F family member 4	Expect = 5e-012
SMAC_03375	NCU04741		Duo1p			EAA31140.1	SMAC_03375	scaffold_2	Expect = 1e-75	Expect = e-108	Expect = 2e-71	sp|O74372	RecName: Full=DASH complex subunit duo1; AltName: Full=Outer
SMAC_03384	NCU04737	sirtuin (SIR2-related histone deacetylases)		nst-1	NST-1		SMAC_03384	scaffold_2		Expect = 0.0	Expect = 0.0	sp|Q01033	not specified	Expect = 6e-008
SMAC_03412	NCU04786	ATPase		now NCU11284 mus/uvs?	RAD16-3		SMAC_03412	scaffold_2	Expect = 0.0	Expect = 0.0	Expect(2) = 0.0	sp|Q10332	RecName: Full=Uncharacterized ATP-dependent helicase C582.10c	Expect = 8e-059
SMAC_03416	NCU04782	histone acetyltransferase MYST		hat-6	HAT-6		SMAC_03416	scaffold_2	Expect = 0.0	Expect = 0.0	Expect = 0.0	sp|Q10325	RecName: Full=Histone acetyltransferase mst2	Expect = 6e-092
SMAC_03465	NCU04826	SCP1					SMAC_03465	scaffold_2	Expect = 0.0	Expect = 0.0	Expect = 0.0	sp|P35749	RecName: Full=Myosin-11; AltName: Full=Myosin heavy chain 11;	Expect = 3e-056
SMAC_03530	NCU02354	Polybromo with 2 bromo- and 1 BAH domains		pbd-1	PBD-1		SMAC_03530	scaffold_9	Expect = 0.0	Expect = 0.0	Expect(2) = 0.0	sp|P53236	RecName: Full=Chromatin structure-remodeling complex subunit RSC1;	Expect = 6e-080
SMAC_03537	NCU02348	ATPase		now NCU11255 mus-25	MUS-25		SMAC_03537	scaffold_9	Expect = 0.0	Expect = 0.0	Expect = 0.0	sp|P41410	RecName: Full=DNA repair protein rhp54; AltName: Full=RAD54 homolog	Expect = 0.0
SMAC_03588	NCU02247	cytosine DNA methyltransferase		dim-2	DIM-2		SMAC_03588	scaffold_9	Expect = 0.0			sp|P34881	RecName: Full=DNA (cytosine-5)-methyltransferase 1; AltName: Full=DNA	Expect = 2e-031
SMAC_03661	NCU02221		Spc34p			EAA30398.1	SMAC_03661	scaffold_9	Expect = e-111	Expect = e-131	Expect = e-126	No hits found	No hits found
SMAC_03691	NCU02249	histone acetyltransferase MYST		hat-5	HAT-5		SMAC_03691	scaffold_9	Expect = 0.0	Expect = 0.0	Expect(2) = 0.0	sp|Q960X4	RecName: Full=Histone acetyltransferase Tip60	Expect = 6e-033
SMAC_03702	NCU02262		Nsl1p/Nsl1R			XP_331038.1	SMAC_03702	scaffold_9	Expect = 7e-85	Expect = e-114	Expect = 2e-79	No hits found	No hits found
SMAC_03720	NCU02276	BROMO		bdp-2			SMAC_03720	scaffold_9	Expect = 0.0	Expect = 0.0	Expect = 0.0	sp|P87152	RecName: Full=Bromodomain-containing protein C25H2.11c	Expect = e-102
SMAC_03832	NCU04730	qde-2		qde-2			SMAC_03832	scaffold_39	Expect = 0.0	Expect = 0.0	Expect = 0.0	sp|Q9SJK3	RecName: Full=Argonaute-like protein At2g27880	Expect = 8e-077
SMAC_03929	NCU01229	histone acetyltransferase GNAT		elp-3	ELP-3		SMAC_03929	scaffold_33	Expect = 0.0	Expect = 0.0	Expect = 0.0	sp|Q02908	RecName: Full=Elongator complex protein 3; AltName:	Expect = 0.0
SMAC_03947	NCU01247	SCC3		scc-3			SMAC_03947	scaffold_33	Expect = 0.0	Expect = 0.0	Expect = 0.0	sp|O13816	RecName: Full=Cohesin subunit psc3; AltName: Full=SCC3 homolog	Expect = 2e-064
SMAC_03972	NCU01276	acetyltransferase GNAT					SMAC_03972	scaffold_33	Expect = 7e-92	Expect(2) = e-104	Expect = 6e-55	sp|Q58ED9	RecName: Full=N-acetyltransferase 5	Expect = 2e-036
SMAC_03984	NCU01290	CBF5 (nucleolar protein)					SMAC_03984	scaffold_33	Expect = 0.0			sp|O43102	RecName: Full=Centromere/microtubule-binding protein cbf5; AltName:
SMAC_04013	NCU01323	SMC1		smc-1			SMAC_04013	scaffold_33	Expect = 0.0	Expect = 0.0	Expect = 0.0	sp|O94383	RecName: Full=Structural maintenance of chromosomes protein 1;	Expect = 0.0
SMAC_04033	NCU01344		Dsn1p			XP_326837.1	SMAC_04033	scaffold_33	Expect = e-163	Expect = 0.0	Expect = 0.0	sp|Q9UUB5	RecName: Full=Kinetochore protein mis13; AltName: Full=NMS complex
SMAC_04033	NCU01344	putative AT-hook protein					SMAC_04033	scaffold_33	Expect = e-163	Expect = 0.0	Expect = 0.0	sp|Q9UUB5	RecName: Full=Kinetochore protein mis13; AltName: Full=NMS complex	Expect = 2e-021
SMAC_04070	NCU03363	mtr4		frh			SMAC_04070	scaffold_57	Expect = 0.0	Expect = 0.0	Expect = 0.0	sp|O14232	RecName: Full=Uncharacterized helicase C6F12.16c	Expect = 0.0
SMAC_04096	NCU03337	qde-3h/rqh-2		recQ-2			SMAC_04096	scaffold_57	Expect = e-146	Expect = e-143	Expect(3) = e-145	sp|Q9DEY9	RecName: Full=Bloom syndrome protein homolog; Short=xBLM	Expect = 3e-071
SMAC_04116	NCU05347	histone H2A variant		hH2Az	H2AZ		SMAC_04116	scaffold_57	Expect = 9e-79	Expect = 4e-76	Expect(2) = 8e-49	sp|Q873G4	RecName: Full=Histone H2A.Z	Expect = 6e-075
SMAC_04223	NCU09995	high mobility group (HMG) proteins		nhp-6??			SMAC_04223	scaffold_12	Expect = 8e-50	Expect = 4e-50	Expect = 8e-38	sp|Q7S045	RecName: Full=Non-histone chromosomal protein 6	Expect = 2e-053
SMAC_04224	NCU09996		CENP-H/Fta3			XP_322854.1	SMAC_04224	scaffold_12	Expect = 5e-50	Expect = 1e-53	Expect(2) = 4e-75	No hits found	No hits found
SMAC_04250	NCU09387	high mobility group (HMG) proteins		fmf-1			SMAC_04250	scaffold_12	Expect = 0.0	Expect = 0.0	Expect = e-178	sp|P34099	RecName: Full=cAMP-dependent protein kinase catalytic subunit;	Expect = 5e-013
SMAC_04290	NCU02728	similar to PRP16					SMAC_04290	scaffold_12	Expect = 0.0	Expect = 0.0	Expect = 0.0	sp|Q9P774	RecName: Full=Pre-mRNA-splicing factor ATP-dependent RNA helicase	Expect = 0.0
SMAC_04341	NCU02684	PWWP domain (in Dnmt3), Ioc4p	crf4-3				SMAC_04341	scaffold_12	Expect = 0.0	Expect = 0.0	Expect(3) = 0.0	sp|O94312	RecName: Full=PWWP domain-containing protein C215.07c
SMAC_04341	NCU02684	PWWP domain (in Dnmt3), Ioc4p		crf4-3			SMAC_04341	scaffold_12	Expect = 0.0	Expect = 0.0	Expect(3) = 0.0	sp|O94312	RecName: Full=PWWP domain-containing protein C215.07c	Expect = 8e-036
SMAC_04352	NCU02695	high mobility group (HMG) proteins					SMAC_04352	scaffold_12	Expect = 1e-78	Expect = 3e-93	Expect = 1e-51	sp|P40262	RecName: Full=Histone H1E	Expect = 3e-008
SMAC_04371	NCU04229	ATPase		csa	RAD26-2		SMAC_04371	scaffold_142	Expect = 0.0	Expect = 0.0	Expect = 0.0	sp|Q9JIM3	RecName: Full=Putative DNA repair and recombination protein	Expect = e-130
SMAC_04395	NCU04198	chromatin assembly complex protein 1		cac-1	CAC-1		SMAC_04395	scaffold_142	Expect = 0.0	Expect = 0.0	Expect(2) = 0.0	sp|Q12495	RecName: Full=Chromatin assembly factor 1 subunit p90; AltName:	Expect = 2e-030
SMAC_04455	NCU04131		Ctf3p/CENP-I			XP_323471.1	SMAC_04455	scaffold_142	Expect = 0.0	Expect = 0.0	Expect(3) = 0.0	sp|P87227	RecName: Full=Inner centromere protein mis6; AltName: Full=Sim4
SMAC_04463	NCU04124	Sc CENP-E-like (not real?)					SMAC_04463	scaffold_142	Expect = 0.0			sp|P34237	RecName: Full=Protein CASP
SMAC_04499	NCU01433	PPT-1					SMAC_04499	scaffold_142	Expect = 0.0	Expect = 0.0	Expect(3) = 0.0	sp|O43049	RecName: Full=Serine/threonine-protein phosphatase T; Short=PPT	Expect = e-148
SMAC_04506	NCU01438	NAP domain		nap-1	NAP-1		SMAC_04506	scaffold_142	Expect = 0.0	Expect = 0.0	Expect(4) = 0.0	sp|O59797	RecName: Full=Putative nucleosome assembly protein C364.06	Expect = e-110
SMAC_04566	NCU03291	SCC1		scc-1			SMAC_04566	scaffold_81	Expect = 0.0	Expect = 0.0	Expect = 0.0	sp|P30776	RecName: Full=Cohesin subunit rad21; AltName:	Expect = 6e-042
SMAC_04602	NCU09106	ATPase		crf10-1	CRF10-1		SMAC_04602	scaffold_81	Expect = 0.0	Expect = 0.0	Expect(2) = 0.0	sp|P87114	RecName: Full=Uncharacterized ATP-dependent helicase fft1; AltName:	Expect = e-124
SMAC_04616	NCU09120	high mobility group (HMG) proteins					SMAC_04616	scaffold_81	Expect = 0.0	Expect = 0.0	Expect = 0.0	sp|Q9VW97	RecName: Full=Possible lysine-specific histone demethylase 1	Expect = 1e-078
SMAC_04675	NCU06568		Nuf2p/Nuf2R			XP_326423.1	SMAC_04675	scaffold_58	Expect = 0.0	Expect = 0.0	Expect = 0.0	sp|Q7S9H0	RecName: Full=Probable kinetochore protein nuf-2
SMAC_04678	NCU06563	PP2A					SMAC_04678	scaffold_58	Expect = 0.0	Expect = 0.0	Expect = e-136	sp|Q10298	RecName: Full=Putative serine/threonine-protein phosphatase	Expect = e-125
SMAC_04748	NCU06621		Bir1p			XP_326476.1	SMAC_04748	scaffold_58	Expect = 0.0	Expect = 0.0	Expect = 0.0	sp|O14064	RecName: Full=Protein bir1; AltName: Full=Chromosome segregation
SMAC_04756	NCU06630	PP2A, cat. subunit					SMAC_04756	scaffold_58	Expect = 0.0	Expect = 0.0	Expect(2) = e-126	sp|P48580	RecName: Full=Serine/threonine-protein phosphatase PP2A catalytic	Expect = 0.0
SMAC_04766	NCU09744		Bub3p			EAA35210.1	SMAC_04766	scaffold_58	Expect = 0.0	Expect = 0.0	Expect = e-134	sp|O43684	RecName: Full=Mitotic checkpoint protein BUB3
SMAC_04812	NCU02795	histone deacetylase HOS2		hda-2	HDA-2		SMAC_04812	scaffold_40	Expect = 0.0	Expect = 0.0	Expect(2) = 0.0	sp|O13298	RecName: Full=Histone deacetylase phd1	Expect = 9e-098
SMAC_04862	NCU09248	CCAAT-binding protein					SMAC_04862	scaffold_40	Expect = 2e-88	Expect = 1e-95	Expect = 1e-30	sp|Q54WV0	RecName: Full=Nuclear transcription factor Y subunit beta; AltName:	Expect = 5e-038
SMAC_04881	NCU09239		PCNA			XP_331631.1	SMAC_04881	scaffold_40	Expect = e-150	Expect = e-143	Expect(2) = e-135	sp|Q03392	RecName: Full=Proliferating cell nuclear antigen; Short=PCNA
SMAC_04881	NCU09239	proliferating cell nuclear antigen (PCNA)					SMAC_04881	scaffold_40	Expect = e-150	Expect = e-143	Expect(2) = e-135	sp|Q03392	RecName: Full=Proliferating cell nuclear antigen; Short=PCNA	Expect = e-100
SMAC_04884	NCU09238		Sim4			XP_331630.1	SMAC_04884	scaffold_40	Expect = e-157	Expect = e-167	Expect = e-144	sp|O62537	RecName: Full=Protein hunchback
SMAC_04895	NCU08598	qde-3		qde-3			SMAC_04895	scaffold_40	Expect = 0.0	Expect = 0.0	Expect = 0.0	sp|Q09811	RecName: Full=ATP-dependent DNA helicase hus2/rqh1	Expect = e-135
SMAC_04964	NCU02068	putative AT-hook and BRCT domain					SMAC_04964	scaffold_3	Expect = 0.0	Expect = 0.0	Expect = 0.0	sp|Q7M732	RecName: Full=Retrotransposon-like protein 1; AltName:	Expect = 8e-022
SMAC_04975	NCU02078	Polybromo with 2 bromodomains		pbd-2	PBD-2		SMAC_04975	scaffold_3	Expect = 0.0	Expect = 0.0	Expect = 0.0	sp|Q90941	RecName: Full=Protein polybromo-1	Expect = 8e-011
SMAC_05070	NCU09696		Srp54p			XP_330346.1	SMAC_05070	scaffold_56	Expect = 0.0	Expect = 0.0	Expect = 0.0	sp|Q00179	RecName: Full=Signal recognition particle 54 kDa protein homolog
SMAC_05100	NCU08919	ATPase		crf2-1	CRF2-1		SMAC_05100	scaffold_56	Expect = 0.0	Expect = 0.0	Expect = 0.0	sp|Q872I5	RecName: Full=Putative DNA helicase ino-80	Expect = 0.0
SMAC_05186	NCU07459	most closely related to CARM1, closer to PRMT2		prmt-1	PRMT-1		SMAC_05186	scaffold_52	Expect = 0.0	Expect = 0.0	Expect = 3e-88	sp|Q9URX7	RecName: Full=Probable protein arginine N-methyltransferase	Expect = e-116
SMAC_05235	NCU09078		Hsk3p			XP_331470.1	SMAC_05235	scaffold_52	Expect = 1e-37	Expect = 3e-57	Expect = 6e-32	sp|O94483	RecName: Full=High osmolarity sensitivity protein 3
SMAC_05255	NCU09100		Mcm21p/Mal2			XP_331492.1	SMAC_05255	scaffold_52	Expect = e-121	Expect = e-138	Expect = e-135	No hits found	No hits found
SMAC_05269	NCU02178	Sad-1		sad-1			SMAC_05269	scaffold_52	Expect = 0.0	Expect = 0.0	Expect = 0.0	sp|O14227	RecName: Full=RNA-dependent RNA polymerase 1; Short=Protein rdp1	Expect = e-139
SMAC_05286	NCU00212	histone H4		hH4-2	H4-2		SMAC_05286	scaffold_59	Expect = 8e-53	Expect = 1e-54	Expect(2) = 6e-46	sp|P04914	RecName: Full=Histone H4	Expect = 3e-053
SMAC_05323	NCU06488	ATPase with bromodomain		crf3-1	CRF3-1		SMAC_05323	scaffold_59	Expect = 0.0	Expect = 0.0	Expect = 0.0	sp|Q9UTN6	RecName: Full=Chromatin structure-remodeling complex subunit snf21;	Expect = 0.0
SMAC_05363	NCU06190	ATPase		atrx	RAD54-2		SMAC_05363	scaffold_59	Expect = 0.0	Expect = 0.0	Expect = 0.0	sp|Q9GQN5	RecName: Full=Transcriptional regulator ATRX homolog; AltName:	Expect = 6e-066
SMAC_05383	NCU01932	SET protein		set-3	SET-3		SMAC_05383	scaffold_51	Expect = 0.0	Expect = 0.0	Expect = 0.0	sp|Q9VW15	RecName: Full=Histone-lysine N-methyltransferase ash1; AltName:	Expect = 4e-045
SMAC_05403	NCU01960	high mobility group (HMG) proteins		matA-3	MATA-3		SMAC_05403	scaffold_51	Expect = 9e-41			sp|Q10116	RecName: Full=Mating-type protein A-3; Short=Mt A-3
SMAC_05417	NCU01973	SET protein		set-8	SET-8		SMAC_05417	scaffold_51	Expect = 0.0	Expect = 0.0	Expect = 0.0	sp|Q55F68	RecName: Full=Adenylate cyclase, terminal-differentiation specific;	Expect = 2e-035
SMAC_05461	NCU02017	TATA-binding factor		ada-2			SMAC_05461	scaffold_51	Expect = 2e-60	Expect = 6e-56	Expect(2) = 7e-57	sp|O14348	RecName: Full=Negative cofactor 2 complex subunit beta; Short=NC2	Expect = 4e-033
SMAC_05478	NCU02034	cytosine DNA methyltransferase		rid	RID		SMAC_05478	scaffold_51	Expect = 0.0			sp|Q17RH7	RecName: Full=Putative protein TPRXL	Expect = 8e-017
SMAC_05479	NCU02035	endonuclease-like		hhh-1 changed to NCU02034.3			SMAC_05479	scaffold_51	Expect = 0.0	Expect(2) = 0.0	Expect(2) = 0.0	sp|Q9SJQ6	RecName: Full=Protein ROS1; AltName: Full=Repressor of silencing 1;	Expect = 2e-008	>ref|XP_964657.1| hypothetical protein NCU02035 [Neurospora crassa OR74A]	[Neurospora crassa OR74A]	Expect = 0.0
SMAC_05735	NCU02626	centromere protein CENP-E (kinesin)					SMAC_05735	scaffold_63	Expect = 0.0			sp|Q6S001	RecName: Full=Kinesin-related protein 11; AltName: Full=Kinesin
SMAC_05745	NCU02616		Cdc20			XP_331815.1	SMAC_05745	scaffold_63	Expect = 0.0	Expect = 0.0	Expect = 0.0	sp|P78972	RecName: Full=WD repeat-containing protein slp1
SMAC_05803	NCU02556	histone acetyltransferase TAFII250		hat-2	HAT-2		SMAC_05803	scaffold_63	Expect = 0.0	Expect = 0.0	Expect = 0.0	sp|Q09813	RecName: Full=Putative transcription initiation factor TFIID 111 kDa	Expect = e-129
SMAC_05878	NCU06907	AT-hook protein with Zn fingers					SMAC_05878	scaffold_71	Expect = 0.0	Expect = 0.0	Expect = 0.0	sp|O14258	RecName: Full=Metallothionein expression activator	Expect = 1e-027
SMAC_05914	NCU06878		Dam1p			EAA29989.1	SMAC_05914	scaffold_71	Expect = 2e-72	Expect(2) = 3e-96	Expect(2) = e-109	sp|Q6C2T8	RecName: Full=DASH complex subunit DAM1; AltName: Full=Outer
SMAC_05926	NCU06863	histone H1		hH1	H1		SMAC_05926	scaffold_71	Expect = 1e-36	Expect = e-110	Expect = 2e-84	sp|Q8J0U2	RecName: Full=Histone H1	Expect = e-108
SMAC_05932	NCU09063	SMC4		smc-4			SMAC_05932	scaffold_71	Expect = 0.0	Expect = 0.0	Expect = 0.0	sp|Q12267	RecName: Full=Structural maintenance of chromosomes protein 4	Expect = 0.0
SMAC_06076	NCU04566	Sc Snf1		snf-1			SMAC_06076	scaffold_21	Expect = 0.0	Expect = 0.0	Expect(2) = 0.0	No hits found
SMAC_06093	NCU04535		Stu2p			XP_323888.1	SMAC_06093	scaffold_21	Expect = 0.0	Expect = 0.0	Expect = 0.0	sp|O94534	RecName: Full=Spindle pole body component alp14; AltName:
SMAC_06178	NCU04002	DMAP1		crf1-4	CRF1-4		SMAC_06178	scaffold_92	Expect = 0.0	Expect = 0.0	Expect = 0.0	sp|Q870Q1	RecName: Full=SWR1-complex protein 4	Expect = 0.0
SMAC_06192	NCU04017	chromo- and chromoshadow domain		hpo	HPO		SMAC_06192	scaffold_92	Expect = e-123	Expect = e-143	Expect(2) = e-114	sp|P40381	RecName: Full=Chromatin-associated protein swi6	Expect = 2e-019
SMAC_06205	NCU01525	histone deacetylase HDA1		hda-1	HDA-1		SMAC_06205	scaffold_74	Expect = e-174	Expect(2) = 0.0	Expect(3) = 0.0	sp|P56523	RecName: Full=Histone deacetylase clr3; AltName: Full=Cryptic loci	Expect = 9e-039
SMAC_06208	NCU01522	chromodomain		cdp-3	CDP-3		SMAC_06208	scaffold_74	Expect = 0.0	Expect = 0.0	Expect = 0.0	sp|Q10103	RecName: Full=Chromo domain-containing protein 1	Expect = 1e-009
SMAC_06298	NCU03875	ATPase		crf4-1	CRF4-1		SMAC_06298	scaffold_68	Expect = 0.0	Expect = 0.0	Expect = 0.0	sp|P38144	RecName: Full=ISWI chromatin-remodeling complex ATPase ISW1	Expect = 0.0
SMAC_06322	NCU03897	ddp-1		ddp-1	DDP-1		SMAC_06322	scaffold_68	Expect = 0.0	Expect = 0.0	Expect = 0.0	sp|O59810	RecName: Full=KH domain-containing protein C550.14	Expect = e-123
SMAC_06324	NCU03899		Ndc80p/Hec1			XP_323218.1	SMAC_06324	scaffold_68	Expect = 0.0	Expect = 0.0	Expect = 0.0	sp|Q96U60	RecName: Full=Probable kinetochore protein ndc-80
SMAC_06401	NCU06119	SET protein		set-5	SET-5		SMAC_06401	scaffold_96	Expect = e-119	Expect = e-121	Expect = 3e-87	sp|Q96KQ7	RecName: Full=Histone-lysine N-methyltransferase, H3 lysine-9	Expect = 1e-008
SMAC_06531	NCU06679	chromatin assembly complex protein 3		cac-3	CAC-3		SMAC_06531	scaffold_67	Expect = 0.0	Expect = 0.0	Expect = 0.0	sp|Q7S7N3	RecName: Full=Histone acetyltransferase type B subunit 2	Expect = 0.0
SMAC_06655	NCU00243		Bim1p			XP_322329.1	SMAC_06655	scaffold_37	Expect = e-120	Expect = e-131	Expect = 7e-95	sp|Q10113	RecName: Full=Microtubule integrity protein mal3
SMAC_06682	NCU00269	SET protein		set-2	SET-2		SMAC_06682	scaffold_37	Expect = 0.0	Expect = 0.0	Expect(3) = 0.0	sp|Q7RZU4	RecName: Full=Histone-lysine N-methyltransferase, H3 lysine-36	Expect = 0.0
SMAC_06727	NCU06737	putative AT-hook protein					SMAC_06727	scaffold_90	Expect = 0.0	Expect = 0.0	Expect = 0.0	sp|P02812	RecName: Full=Basic salivary proline-rich protein 2; Short=Salivary	Expect = 9e-015
SMAC_06744	NCU11159		Spc25p			CAD70393.1	SMAC_06744	scaffold_90	Expect = 5e-39	Expect = 2e-83	Expect(2) = e-136	sp|Q873B7	RecName: Full=Probable kinetochore protein spc-25
SMAC_06757	NCU06766	dcl-2		dcl-2			SMAC_06757	scaffold_90	Expect = 0.0	Expect = 0.0	Expect(2) = 0.0	sp|Q7SCC1	RecName: Full=Dicer-like protein 2; Includes: RecName:	Expect = 0.0
SMAC_06777	NCU06787	perhaps in HDAC-complex		cdp-6			SMAC_06777	scaffold_90	Expect = 0.0	Expect = 0.0	Expect = 2e-90	sp|Q4WPW2	RecName: Full=Chromatin modification-related protein eaf3	Expect = 3e-052
SMAC_06778	NCU06788	chromodomain (MOF-like)		cdp-6			SMAC_06778	scaffold_90	Expect = 8e-73	Expect = 1e-73	Expect = 6e-75	sp|Q5BBV4	RecName: Full=Chromatin modification-related protein eaf3	Expect = 7e-031
SMAC_06840	NCU01871	replication-licensing factor					SMAC_06840	scaffold_27	Expect = 3e-80	Expect = 1e-93	Expect = 4e-65	sp|Q9UUD1	RecName: Full=Sterol regulatory element-binding protein 1;	Expect = 8e-020
SMAC_07041	NCU01471	Snf4		NCU01471.1			SMAC_07041	scaffold_19	Expect = 0.0	Expect = 0.0	Expect(3) = e-164	sp|Q9P869	RecName: Full=Nuclear protein SNF4	Expect = 1e-096
SMAC_07185	NCU05218	histone acetyltransferase MYST		hat-4	HAT-4		SMAC_07185	scaffold_47	Expect = 0.0	Expect = 0.0	Expect(2) = 0.0	sp|Q7S9B6	RecName: Full=Histone acetyltransferase esa-1; AltName:	Expect = 0.0
SMAC_07189	NCU05211		Sli15p			XP_324568.1	SMAC_07189	scaffold_47	Expect = 0.0	Expect = 0.0	Expect = 0.0	sp|Q1MTN3	RecName: Full=Inner centromere protein-related protein pic1;
SMAC_07212	NCU03481	high mobility group (HMG) proteins					SMAC_07212	scaffold_98	Expect = 0.0	Expect = 0.0	Expect(2) = 0.0	sp|Q2PG84	RecName: Full=Transcription factor Sox-1; Short=xSox1;	Expect = 5e-022
SMAC_07295	NCU07589	acetyltransferase GNAT					SMAC_07295	scaffold_36	Expect = 2e-90	Expect = 1e-95	Expect(2) = 3e-90	sp|P79081	RecName: Full=N-acetyltransferase ats1	Expect = 1e-025
SMAC_07296	NCU07591		Fta1			XP_328297.1	SMAC_07296	scaffold_36	Expect = e-165	Expect = e-169	Expect(2) = e-163	No hits found	No hits found
SMAC_07316	NCU07624	sirtuin (SIR2-related histone deacetylases)		nst-7	NST-7		SMAC_07316	scaffold_36	Expect = e-142	Expect = e-139	Expect(2) = e-135	sp|Q8BKJ9	RecName: Full=NAD-dependent deacetylase sirtuin-7; AltName:	Expect = 3e-013
SMAC_07345	NCU04402	histone methyltransferase		dim-5	DIM-5		SMAC_07345	scaffold_35	Expect = 0.0	Expect = 0.0	Expect(2) = 0.0	sp|Q8X225	RecName: Full=Histone-lysine N-methyltransferase, H3 lysine-9	Expect = 0.0
SMAC_07360	NCU04394	putative AT-hook protein					SMAC_07360	scaffold_35		Expect = 1e-51	Expect(2) = 1e-56	sp|P48988	RecName: Full=Major centromere autoantigen B; Short=Centromere	Expect = 8e-019
SMAC_07369	NCU07018	histone deacetylase HOS3		hda-4	HDA-4		SMAC_07369	scaffold_35	Expect = 0.0	Expect = 0.0	Expect = 0.0	sp|Q02959	RecName: Full=Histone deacetylase HOS3	Expect = 2e-083
SMAC_07534	NCU01206	histone methyltransferase		set-1	SET-1		SMAC_07534	scaffold_101	Expect = 0.0	Expect = 0.0	Expect = 0.0	sp|Q8X0S9	RecName: Full=Histone-lysine N-methyltransferase, H3 lysine-4	Expect = 0.0
SMAC_07645	NCU05802	most homeless-like RNA helicase A					SMAC_07645	scaffold_8	Expect = 0.0	Expect = 0.0	Expect = 0.0	sp|Q7Z478	RecName: Full=ATP-dependent RNA helicase DHX29; AltName: Full=DEAH	Expect = e-173
SMAC_07773	NCU03537		Chl4p			XP_322795.1	SMAC_07773	scaffold_5	Expect = 0.0	Expect = 0.0	Expect = 0.0	sp|P38907	RecName: Full=Central kinetochore subunit CHL4; AltName:
SMAC_07833	NCU04258	hypo. Protein					SMAC_07833	scaffold_61	Expect = 0.0	Expect = 0.0	Expect = 0.0	sp|Q9NZW4	RecName: Full=Dentin sialophosphoprotein; Contains: RecName:	Expect = 5e-014
SMAC_07858	NCU09521	ribosome assembly/nuclear pore complex					SMAC_07858	scaffold_84	Expect = 0.0	Expect = 0.0	Expect = 0.0	sp|Q9P783	RecName: Full=Ribosome assembly protein rrb1	Expect = e-115
SMAC_07864	NCU09516	ATPase with ringfinger		mus-41 (rad5)	RAD5-1		SMAC_07864	scaffold_84	Expect = 0.0	Expect = 0.0	Expect(2) = 0.0	sp|Q7S1P9	RecName: Full=DNA repair protein rad-5	Expect = 0.0
SMAC_07943	NCU08852	poly (ADP-ribose) polymerase		parp-1	PARP		SMAC_07943	scaffold_62	Expect = 0.0	Expect = 0.0	Expect(3) = 0.0	sp|Q11207	RecName: Full=Poly [ADP-ribose] polymerase 2; Short=PARP-2;	Expect = 1e-078
SMAC_08068	NCU07489	PPZ					SMAC_08068	scaffold_41	Expect = 0.0	Expect = 0.0	Expect(2) = 0.0	sp|P78968	RecName: Full=Serine/threonine-protein phosphatase PP-Z	Expect = e-160
SMAC_08093	NCU00108	Ipl1/aurora kinase					SMAC_08093	scaffold_50	Expect = 0.0	Expect = 0.0	Expect = 0.0	sp|O59790	RecName: Full=Serine/threonine-protein kinase ark1; AltName:	Expect = e-105
SMAC_08093	NCU00108		Ipl1p			XP_322194.1	SMAC_08093	scaffold_50	Expect = 0.0	Expect = 0.0	Expect = 0.0	sp|O59790	RecName: Full=Serine/threonine-protein kinase ark1; AltName:
SMAC_08132	NCU08423	BROMO		bdp-3			SMAC_08132	scaffold_114	Expect = e-106	Expect = e-171	Expect = e-147	sp|Q2T9N0	RecName: Full=Fibrous sheath CABYR-binding protein	Expect = 4e-027
SMAC_08161	NCU09468		a-tubulin			XP_329827.1	SMAC_08161	scaffold_10	Expect = 0.0	Expect = 0.0	Expect(3) = e-163	sp|P38669	RecName: Full=Tubulin alpha-B chain
SMAC_08199	NCU09495	SET protein		set-6	SET-6		SMAC_08199	scaffold_10	Expect = e-164	Expect = e-157	Expect = e-157	sp|O74467	RecName: Full=SET domain-containing protein 5	Expect = 2e-035
SMAC_08279	NCU03405		Dad1p			XP_322663.1	SMAC_08279	scaffold_82	Expect = 9e-47	Expect = 6e-50	Expect(2) = 2e-50	sp|Q6BL27	RecName: Full=DASH complex subunit DAD1; AltName: Full=Outer
SMAC_08301	NCU02411	SCP3					SMAC_08301	scaffold_108	Expect = 0.0	Expect = 0.0	Expect = 0.0	sp|Q9QXS1	RecName: Full=Plectin-1; AltName: Full=Plectin-6; Short=PLTN;	Expect = 2e-048
SMAC_08307	NCU11256	acetyltransferase GNAT					SMAC_08307	scaffold_108	Expect = 6e-49			sp|Q8CES0	RecName: Full=N-acetyltransferase MAK3 homolog; AltName:
SMAC_08323	NCU02435	histone H2B		hH2B	H2B		SMAC_08323	scaffold_108	Expect = 5e-74	Expect = 2e-72	Expect(2) = 2e-31	sp|P37210	RecName: Full=Histone H2B	Expect = 4e-071
SMAC_08324	NCU02437	histone H2A		hH2A	H2A		SMAC_08324	scaffold_108	Expect = 2e-72	Expect = 9e-72	Expect(2) = 9e-60	sp|Q8X132	RecName: Full=Histone H2A	Expect = 1e-070
SMAC_08387	NCU01413		Slk19p			XP_326906.1	SMAC_08387	scaffold_133	Expect = 5e-30	Expect = 3e-45	Expect = 3e-45	sp|P19837	RecName: Full=Spidroin-1; AltName: Full=Dragline silk fibroin 1
SMAC_08496	NCU08068		Spc19p			EAA35963.1	SMAC_08496	scaffold_89	Expect = 1e-70	Expect = 8e-95	Expect = 8e-95	sp|Q6BHU0	RecName: Full=DASH complex subunit SPC19; AltName: Full=Outer
SMAC_08520	NCU09914	acetyltransferase GNAT					SMAC_08520	scaffold_89	Expect = e-106	Expect = e-105	Expect = 2e-99	No hits found
SMAC_08565	NCU07952	putative AT-hook protein with Zn finger					SMAC_08565	scaffold_18	Expect = 0.0	Expect = 0.0	Expect = 0.0	sp|P53968	RecName: Full=Transcriptional regulator CRZ1	Expect = 6e-040
SMAC_08605	NCU09434	sms-2		sms-2			SMAC_08605	scaffold_72	Expect = 0.0	Expect = 0.0	Expect = 0.0	sp|O74957	RecName: Full=Protein argonaute; AltName: Full=Eukaryotic	Expect = e-105
SMAC_08608	NCU09436	anti-silencing factor (Asf)					SMAC_08608	scaffold_72	Expect = e-136	Expect = e-151	Expect(2) = 7e-81	sp|Q7S1X9	RecName: Full=Histone chaperone asf-1; AltName: Full=Anti-silencing	Expect = e-149
SMAC_08883	NCU06463		Mtw1p/Mis12			XP_326318.1	SMAC_08883	scaffold_23	Expect = e-132	Expect = 0.0	Expect(2) = e-175	sp|P39731	RecName: Full=Kinetochore-associated protein MTW1; AltName:
SMAC_08892	NCU06472	histone acetyltransferase HAT1		hat-1	HAT-1		SMAC_08892	scaffold_23	Expect = 0.0	Expect = 0.0	Expect = 0.0	sp|Q7RYU8	RecName: Full=Histone acetyltransferase type B catalytic subunit	Expect = 0.0
SMAC_08905	NCU09609		Mif2p/CENP-C			XP_330259.1	SMAC_08905	scaffold_124	Expect = 0.0	Expect = 0.0	Expect(2) = 0.0	sp|Q9USR9	RecName: Full=Centromere protein 3; AltName: Full=CENP-C homolog
SMAC_08905	NCU09609	AT-hook protein					SMAC_08905	scaffold_124	Expect = 0.0	Expect = 0.0	Expect(2) = 0.0	sp|Q9USR9	RecName: Full=Centromere protein 3; AltName: Full=CENP-C homolog	Expect = 1e-024
SMAC_09019	NCU05781		Mad2p			XP_325636.1	SMAC_09019	scaffold_131	Expect = e-109	Expect = e-117	Expect(2) = e-108	sp|O14417	RecName: Full=Mitotic spindle checkpoint component mad2
SMAC_09162	NCU02326	high mobility group (HMG) proteins					SMAC_09162	scaffold_42	Expect = e-107	Expect = e-105	Expect = e-105	No hits found
SMAC_09256	NCU04859	sirtuin (SIR2-related histone deacetylases)		nst-5	NST-5		SMAC_09256	scaffold_117	Expect = 0.0	Expect = 0.0	Expect = 0.0	sp|P53687	RecName: Full=NAD-dependent histone deacetylase HST3; AltName:	Expect = 8e-042
SMAC_09284	NCU09993	ATPase		crf1-1	CRF1-1		SMAC_09284	scaffold_140	Expect = 0.0	Expect = 0.0	Expect = 0.0	sp|Q7S133	RecName: Full=Helicase swr-1	Expect = 0.0
SMAC_09465	NCU08809	BROMO		bdp-1			SMAC_09465	scaffold_105	Expect = 0.0	Expect = 0.0	Expect(2) = 0.0	sp|Q54BA2	RecName: Full=Ankyrin repeat, bromo and BTB domain-containing	Expect = 2e-016
SMAC_09759	no hit	sirtuin (SIR2-related histone deacetylases)					SMAC_09759	contig_2058		Expect = 1e-48	Expect = 2e-48	No hits found
SMAC_12622	NCU10337	ATPase with chromodomain		crf7-1	CRF7-1		SMAC_12622	scaffold_133	Expect = 0.0			sp|Q9P793	RecName: Full=Chromatin remodeling factor mit1; AltName:
No hits found	NCU10897		Dad4p			AABX01000214.16	No hits found
No hits found	NCU00996	centromere protein CENP-B	abp-1	ABP-1			No hits found
No hits found	NCU04338	histone H4 pseudogene		hH4v	H4v		No hits found
No hits found	NCU05672	putative AT-hook protein					No hits found
No hits found	no match	SpTas3
No hits found	no match	SpChp1
No hits found	not found	SCP2

## Sheet: ChromatinProteins
Chromatin-associated genes (Neurospora crassa vs Sordaria macrospora)						pep blastp	cds blastx	genes blastx	pep blastp against Swissprot
N.c. locus	Name	N.c. gene	N.c. protein	Sordaria locus	scaffold/contig	e-value blastp	e-value blastx	e-value blastx	best hit	best hit name	e-value
nucleosome assembly and nucleosome spacing
NCU02437	histone H2A	hH2A	H2A	SMAC_08324	scaffold_108	Expect = 2e-72	Expect = 9e-72	Expect(2) = 9e-60	sp|Q8X132	RecName: Full=Histone H2A	Expect = 1e-070
NCU02435	histone H2B	hH2B	H2B	SMAC_08323	scaffold_108	Expect = 5e-74	Expect = 2e-72	Expect(2) = 2e-31	sp|P37210	RecName: Full=Histone H2B	Expect = 4e-071
NCU01635	histone H3	hH3	H3	SMAC_02363	scaffold_14	Expect = 4e-75	Expect = 2e-71	Expect = 2e-67	sp|P07041	RecName: Full=Histone H3	Expect = 2e-070
NCU01634	histone H4	hH4-1	H4-1	SMAC_02364	scaffold_14	Expect = 8e-53	Expect = 1e-54	Expect(2) = 3e-46	sp|P04914	RecName: Full=Histone H4
NCU00212	histone H4	hH4-2	H4-2	SMAC_05286	scaffold_59	Expect = 8e-53	Expect = 1e-54	Expect(2) = 6e-46	sp|P04914	RecName: Full=Histone H4	Expect = 3e-053
NCU04338	histone H4 pseudogene	hH4v	H4v	none
NCU06863	histone H1	hH1	H1	SMAC_05926	scaffold_71	Expect = 1e-36	Expect = e-110	Expect = 2e-84	sp|Q8J0U2	RecName: Full=Histone H1	Expect = e-108
NCU00145	histone H3 variant (CSE4, Cnp1, CENP-A, CID)	hH3v	CenH3	SMAC_02279	scaffold_16			Expect = 2e-37	sp|Q7RXR3	RecName: Full=Histone H3-like centromeric protein cse-4; AltName:	Expect = 5e-012
NCU05347.1	histone H2A variant	hH2Az	H2AZ	SMAC_04116	scaffold_57	Expect = 9e-79	Expect = 4e-76	Expect(2) = 8e-49	sp|Q873G4	RecName: Full=Histone H2A.Z	Expect = 6e-075
NCU06405	histone-like nuclear protein, DR1-like			SMAC_02166	scaffold_16	Expect = e-103	Expect = e-149	Expect = e-149	sp|Q6C6M5	RecName: Full=DNA polymerase epsilon subunit C; Short=DNA	Expect = 1e-021
chromatin assembly and maintenance
chromatin assembly factor
NCU04198.1	chromatin assembly complex protein 1	cac-1	CAC-1	SMAC_04395	scaffold_142	Expect = 0.0	Expect = 0.0	Expect(2) = 0.0	sp|Q12495	RecName: Full=Chromatin assembly factor 1 subunit p90; AltName:	Expect = 2e-030
NCU08357.1	chromatin assembly complex protein 2	cac-2	CAC-2	SMAC_01629	scaffold_4	Expect = 0.0	Expect = 0.0	Expect(3) = 0.0	sp|O13985	RecName: Full=Uncharacterized WD repeat-containing protein C26H5.03	Expect = 3e-078
NCU06679.1	chromatin assembly complex protein 3	cac-3	CAC-3	SMAC_06531	scaffold_67	Expect = 0.0	Expect = 0.0	Expect = 0.0	sp|Q7S7N3	RecName: Full=Histone acetyltransferase type B subunit 2	Expect = 0.0
NCU09521.1	ribosome assembly/nuclear pore complex			SMAC_07858	scaffold_84	Expect = 0.0	Expect = 0.0	Expect = 0.0	sp|Q9P783	RecName: Full=Ribosome assembly protein rrb1	Expect = e-115
nucleosome assembly factor
NCU03769.1	NAP domain	nap-2	NAP-2	SMAC_02618	scaffold_6	Expect = e-140	Expect = e-175	Expect(3) = e-164	sp|Q9HGN2	RecName: Full=Putative nucleosome assembly protein C36B7.08c	Expect = 8e-025
NCU01438.1	NAP domain	nap-1	NAP-1	SMAC_04506	scaffold_142	Expect = 0.0	Expect = 0.0	Expect(4) = 0.0	sp|O59797	RecName: Full=Putative nucleosome assembly protein C364.06	Expect = e-110
NCU09436.1	anti-silencing factor (Asf)			SMAC_08608	scaffold_72	Expect = e-136	Expect = e-151	Expect(2) = 7e-81	sp|Q7S1X9	RecName: Full=Histone chaperone asf-1; AltName: Full=Anti-silencing	Expect = e-149
DNA binding protein involved in repair, cell cycle control, apoptosis
NCU09239.1	proliferating cell nuclear antigen (PCNA)			SMAC_04881	scaffold_40	Expect = e-150	Expect = e-143	Expect(2) = e-135	sp|Q03392	RecName: Full=Proliferating cell nuclear antigen; Short=PCNA	Expect = e-100
DNA methylation machinery
NCU02034.1	cytosine DNA methyltransferase	rid	RID	SMAC_05478	scaffold_51			Expect = 0.0	sp|Q17RH7	RecName: Full=Putative protein TPRXL	Expect = 8e-017
NCU02247.1	cytosine DNA methyltransferase	dim-2	DIM-2	SMAC_03588	scaffold_9	Expect = 0.0			sp|P34881	RecName: Full=DNA (cytosine-5)-methyltransferase 1; AltName: Full=DNA
NCU04258.1	hypo. Protein			SMAC_07833	scaffold_61	Expect = 0.0	Expect = 0.0	Expect = 0.0	sp|Q9NZW4	RecName: Full=Dentin sialophosphoprotein; Contains: RecName:	Expect = 5e-014
no methyl binding domain proteins
chromatin remodelling
chromatin remodelling factors (crf)
NCU09993.1	ATPase	crf1-1	CRF1-1	SMAC_09284	scaffold_140	Expect = 0.0	Expect = 0.0	Expect = 0.0	sp|Q7S133	RecName: Full=Helicase swr-1	Expect = 0.0
NCU08919.1	ATPase	crf2-1	CRF2-1	SMAC_05100	scaffold_56	Expect = 0.0	Expect = 0.0	Expect = 0.0	sp|Q872I5	RecName: Full=Putative DNA helicase ino-80	Expect = 0.0
NCU06488.1	ATPase with bromodomain	crf3-1	CRF3-1	SMAC_05323	scaffold_59	Expect = 0.0	Expect = 0.0	Expect = 0.0	sp|Q9UTN6	RecName: Full=Chromatin structure-remodeling complex subunit snf21;	Expect = 0.0
NCU03875.1	ATPase	crf4-1	CRF4-1	SMAC_06298	scaffold_68	Expect = 0.0	Expect = 0.0	Expect = 0.0	sp|P38144	RecName: Full=ISWI chromatin-remodeling complex ATPase ISW1	Expect = 0.0
NCU06306.1	ATPase	crf5-1	CRF5-1	SMAC_01043	scaffold_17	Expect = 0.0	Expect = 0.0	Expect = 0.0	sp|Q9NRZ9	RecName: Full=Lymphoid-specific helicase; AltName:	Expect = 5e-073
NCU03060.1	ATPase with chromodomains	crf6-1	CRF6-1	SMAC_02791	scaffold_31	Expect = 0.0	Expect = 0.0	Expect = 0.0	sp|O14139	RecName: Full=Chromodomain helicase hrp3; AltName: Full=ATP-dependent	Expect = 0.0
NCU10337	ATPase with chromodomain	crf7-1	CRF7-1	SMAC_12622	scaffold_133	Expect = 0.0			sp|Q9P793	RecName: Full=Chromatin remodeling factor mit1; AltName:
NCU07556.1	ATPase	crf8-1	CRF8-1	SMAC_02000	scaffold_29	Expect = 0.0	Expect = 0.0	Expect = 0.0	sp|O43065	RecName: Full=Probable helicase mot1; AltName: Full=TBP-associated	Expect = 0.0
NCU00631.1	ATPase	crf9-1	CRF9-1	SMAC_01316	scaffold_4	Expect = 0.0	Expect = 0.0	Expect = 0.0	sp|O60177	RecName: Full=Uncharacterized ATP-dependent helicase C23E6.02	Expect = e-125
NCU09106.1	ATPase	crf10-1	CRF10-1	SMAC_04602	scaffold_81	Expect = 0.0	Expect = 0.0	Expect(2) = 0.0	sp|P87114	RecName: Full=Uncharacterized ATP-dependent helicase fft1; AltName:	Expect = e-124
NCU00164.1	ITC-1	crf4-2	CRF4-2	SMAC_02263	scaffold_16	Expect = 0.0	Expect = 0.0	Expect = 0.0	sp|P53125	RecName: Full=Imitation switch two complex protein 1	Expect = 3e-038
NCU02684.1	PWWP domain (in Dnmt3), Ioc4p	crf4-3		SMAC_04341	scaffold_12	Expect = 0.0	Expect = 0.0	Expect(3) = 0.0	sp|O94312	RecName: Full=PWWP domain-containing protein C215.07c	Expect = 8e-036
NCU04002.1	DMAP1	crf1-4	CRF1-4	SMAC_06178	scaffold_92	Expect = 0.0	Expect = 0.0	Expect = 0.0	sp|Q870Q1	RecName: Full=SWR1-complex protein 4	Expect = 0.0
chromatin remodelling factors involved in DNA repair
	Rad8/RAD5 group
NCU09516.1	ATPase with ringfinger	mus-41 (rad5)	RAD5-1	SMAC_07864	scaffold_84	Expect = 0.0	Expect = 0.0	Expect(2) = 0.0	sp|Q7S1P9	RecName: Full=DNA repair protein rad-5	Expect = 0.0
NCU07975.1	ATPase	mus/uvs?	RAD5-2	SMAC_01819	scaffold_29	Expect = 0.0	Expect = 0.0	Expect(4) = 0.0	sp|Q9FF61	RecName: Full=Putative SWI/SNF-related matrix-associated	Expect = 3e-075
NCU07358.1	ATPase	mus/uvs?	RAD5-3	SMAC_00304	scaffold_7	Expect = 0.0	Expect = 0.0	Expect(3) = 0.0	sp|O60177	RecName: Full=Uncharacterized ATP-dependent helicase C23E6.02	Expect = 8e-014
NCU05246.1	ATPase	mus/uvs?	RAD5-4	SMAC_01745	scaffold_29	Expect = 0.0	Expect = 0.0	Expect = 0.0	sp|Q9FF61	RecName: Full=Putative SWI/SNF-related matrix-associated	Expect = 6e-090
NCU04424.1	ATPase	mus/uvs?	RAD5-5	SMAC_01719	scaffold_29	Expect = 4e-60	Expect(2) = 2e-60	Expect = 6e-97	sp|Q9FF61	RecName: Full=Putative SWI/SNF-related matrix-associated	Expect = 1e-024
NCU04445.1	ATPase	mus/uvs?	RAD5-6	SMAC_01162	scaffold_17	Expect = 2e-30	Expect = 2e-31	Expect = 7e-38	sp|O60177	RecName: Full=Uncharacterized ATP-dependent helicase C23E6.02	Expect = 2e-016
NCU02913.1	ATPase	mus/uvs?	RAD5-7	SMAC_00571	scaffold_7	Expect = e-165	Expect = e-159	Expect(2) = e-153	sp|P36607	RecName: Full=DNA repair protein rad5	Expect = 8e-039
	Rhp26/RAD26 group
NCU07837.1	ATPase	csb	RAD26-1	SMAC_02114	scaffold_16	Expect = 0.0	Expect = 0.0	Expect = 0.0	sp|Q9UR24	RecName: Full=DNA repair protein rhp26; AltName: Full=RAD26 homolog	Expect = 0.0
NCU04229.1	ATPase	csa	RAD26-2	SMAC_04371	scaffold_142	Expect = 0.0	Expect = 0.0	Expect = 0.0	sp|Q9JIM3	RecName: Full=Putative DNA repair and recombination protein	Expect = e-130
	RAD16 group
NCU03652.1	ATPase	mus/uvs?	RAD16-1	SMAC_02529	scaffold_6	Expect = 0.0	Expect = 0.0	Expect(2) = 0.0	sp|Q9UTL9	RecName: Full=Uncharacterized ATP-dependent helicase C144.05	Expect = e-139
NCU03650.1	ATPase	mus/uvs?	RAD16-2	SMAC_02527	scaffold_6	Expect = 0.0	Expect = 0.0	Expect(2) = 0.0	sp|P31244	RecName: Full=DNA repair protein RAD16; AltName: Full=ATP-dependent	Expect = 0.0
NCU04786.1	ATPase	now NCU11284 mus/uvs?	RAD16-3	SMAC_03412	scaffold_2	Expect = 0.0	Expect = 0.0	Expect(2) = 0.0	sp|Q10332	RecName: Full=Uncharacterized ATP-dependent helicase C582.10c	Expect = 8e-059
	RAD54 group
NCU06190.1	ATPase	atrx	RAD54-2	SMAC_05363	scaffold_59	Expect = 0.0	Expect = 0.0	Expect = 0.0	sp|Q9GQN5	RecName: Full=Transcriptional regulator ATRX homolog; AltName:	Expect = 6e-066
NCU02348.1	ATPase	now NCU11255 mus-25	MUS-25	SMAC_03537	scaffold_9	Expect = 0.0	Expect = 0.0	Expect = 0.0	sp|P41410	RecName: Full=DNA repair protein rhp54; AltName: Full=RAD54 homolog	Expect = 0.0
HMG-like transcription factors
NCU09995.1	high mobility group (HMG) proteins	nhp-6??		SMAC_04223	scaffold_12	Expect = 8e-50	Expect = 4e-50	Expect = 8e-38	sp|Q7S045	RecName: Full=Non-histone chromosomal protein 6	Expect = 2e-053
NCU02819.1	high mobility group (HMG) proteins			SMAC_00615	scaffold_7	Expect = 0.0	Expect = 0.0	Expect = 0.0	sp|O04235	RecName: Full=FACT complex subunit SSRP1; AltName: Full=Facilitates	Expect = 5e-014
NCU02695.1	high mobility group (HMG) proteins			SMAC_04352	scaffold_12	Expect = 1e-78	Expect = 3e-93	Expect = 1e-51	sp|P40262	RecName: Full=Histone H1E	Expect = 3e-008
NCU01960.1	high mobility group (HMG) proteins	matA-3	MATA-3	SMAC_05403	scaffold_51	Expect = 9e-41			sp|Q10116	RecName: Full=Mating-type protein A-3; Short=Mt A-3
NCU03481.1	high mobility group (HMG) proteins			SMAC_07212	scaffold_98	Expect = 0.0	Expect = 0.0	Expect(2) = 0.0	sp|Q2PG84	RecName: Full=Transcription factor Sox-1; Short=xSox1;	Expect = 5e-022
NCU09387.1	high mobility group (HMG) proteins	fmf-1		SMAC_04250	scaffold_12	Expect = 0.0	Expect = 0.0	Expect = e-178	sp|P34099	RecName: Full=cAMP-dependent protein kinase catalytic subunit;	Expect = 5e-013
NCU02326.1	high mobility group (HMG) proteins			SMAC_09162	scaffold_42	Expect = e-107	Expect = e-105	Expect = e-105	No hits found
NCU09120.1	high mobility group (HMG) proteins			SMAC_04616	scaffold_81	Expect = 0.0	Expect = 0.0	Expect = 0.0	sp|Q9VW97	RecName: Full=Possible lysine-specific histone demethylase 1	Expect = 1e-078
histone-like transcription factors
NCU02017.1	TATA-binding factor	ada-2		SMAC_05461	scaffold_51	Expect = 2e-60	Expect = 6e-56	Expect(2) = 7e-57	sp|O14348	RecName: Full=Negative cofactor 2 complex subunit beta; Short=NC2	Expect = 4e-033
NCU03073.1	DNA POL II subunit			SMAC_02803	scaffold_31	Expect = 3e-98	Expect = e-157	Expect = 4e-91	sp|Q6BIP4	RecName: Full=DNA polymerase epsilon subunit D; Short=DNA	Expect = 3e-015
NCU09248.1	CCAAT-binding protein			SMAC_04862	scaffold_40	Expect = 2e-88	Expect = 1e-95	Expect = 1e-30	sp|Q54WV0	RecName: Full=Nuclear transcription factor Y subunit beta; AltName:	Expect = 5e-038
histone modification
	histone deacetylases
NCU01525.1	histone deacetylase HDA1	hda-1	HDA-1	SMAC_06205	scaffold_74	Expect = e-174	Expect(2) = 0.0	Expect(3) = 0.0	sp|P56523	RecName: Full=Histone deacetylase clr3; AltName: Full=Cryptic loci	Expect = 9e-039
NCU02795.1	histone deacetylase HOS2	hda-2	HDA-2	SMAC_04812	scaffold_40	Expect = 0.0	Expect = 0.0	Expect(2) = 0.0	sp|O13298	RecName: Full=Histone deacetylase phd1	Expect = 9e-098
NCU00824.1	histone deacetylase RPD3	hda-3	HDA-3	SMAC_01503	scaffold_4	Expect = 0.0	Expect = 0.0	Expect(4) = 0.0	sp|P32561	RecName: Full=Histone deacetylase RPD3; AltName:	Expect = 0.0
NCU07018.1	histone deacetylase HOS3	hda-4	HDA-4	SMAC_07369	scaffold_35	Expect = 0.0	Expect = 0.0	Expect = 0.0	sp|Q02959	RecName: Full=Histone deacetylase HOS3	Expect = 2e-083
	SIR2-related histone deacetylases
NCU04737.1	sirtuin (SIR2-related histone deacetylases)	nst-1	NST-1	SMAC_03384	scaffold_2		Expect = 0.0	Expect = 0.0	sp|Q01033	not specified	Expect = 6e-008
NCU07624.1	sirtuin (SIR2-related histone deacetylases)	nst-7	NST-7	SMAC_07316	scaffold_36	Expect = e-142	Expect = e-139	Expect(2) = e-135	sp|Q8BKJ9	RecName: Full=NAD-dependent deacetylase sirtuin-7; AltName:	Expect = 3e-013
no locus assigned	sirtuin (SIR2-related histone deacetylases)	nst-6	NST-6	none
NCU04859.1	sirtuin (SIR2-related histone deacetylases)	nst-5	NST-5	SMAC_09256	scaffold_117	Expect = 0.0	Expect = 0.0	Expect = 0.0	sp|P53687	RecName: Full=NAD-dependent histone deacetylase HST3; AltName:	Expect = 8e-042
NCU00203.1	sirtuin (SIR2-related histone deacetylases)	nst-4	NST-4	SMAC_02226	scaffold_16	Expect = e-127	Expect = e-134	Expect = e-134	sp|Q89EA6	RecName: Full=NAD-dependent deacetylase 2; AltName: Full=Regulatory	Expect = 4e-039
NCU03059.1	sirtuin (SIR2-related histone deacetylases)	nst-3	NST-3	SMAC_02788	scaffold_31	Expect = 0.0	Expect = 0.0	Expect = 0.0	sp|Q9UR39	RecName: Full=NAD-dependent deacetylase hst4; AltName:	Expect = 8e-065
				SMAC_09759	contig_2058		Expect = 1e-48	Expect = 2e-48	No hits found
NCU00523.1	sirtuin (SIR2-related histone deacetylases)	nst-2	NST-2	SMAC_01219	scaffold_4	Expect = e-180	Expect = 0.0	Expect(3) = 0.0	sp|P43619	RecName: Full=Nicotinate-nucleotide pyrophosphorylase	Expect = 4e-087
	histone acetyltransferases
NCU04782.1	histone acetyltransferase MYST	hat-6	HAT-6	SMAC_03416	scaffold_2	Expect = 0.0	Expect = 0.0	Expect = 0.0	sp|Q10325	RecName: Full=Histone acetyltransferase mst2	Expect = 6e-092
NCU05218.1	histone acetyltransferase MYST	hat-4	HAT-4	SMAC_07185	scaffold_47	Expect = 0.0	Expect = 0.0	Expect(2) = 0.0	sp|Q7S9B6	RecName: Full=Histone acetyltransferase esa-1; AltName:	Expect = 0.0
NCU02249.1	histone acetyltransferase MYST	hat-5	HAT-5	SMAC_03691	scaffold_9	Expect = 0.0	Expect = 0.0	Expect(2) = 0.0	sp|Q960X4	RecName: Full=Histone acetyltransferase Tip60	Expect = 6e-033
no locus assigned	histone acetyltransferase GNAT	ngf-1	NGF-1	SMAC_00218	scaffold_7	Expect = 0.0	Expect = 0.0	Expect = 0.0	sp|Q8WZM0	RecName: Full=Histone acetyltransferase GCN5	Expect = e-144
NCU01229.1	histone acetyltransferase GNAT	elp-3	ELP-3	SMAC_03929	scaffold_33	Expect = 0.0	Expect = 0.0	Expect = 0.0	sp|Q02908	RecName: Full=Elongator complex protein 3; AltName:	Expect = 0.0
NCU06472.1	histone acetyltransferase HAT1	hat-1	HAT-1	SMAC_08892	scaffold_23	Expect = 0.0	Expect = 0.0	Expect = 0.0	sp|Q7RYU8	RecName: Full=Histone acetyltransferase type B catalytic subunit	Expect = 0.0
NCU02556.1	histone acetyltransferase TAFII250	hat-2	HAT-2	SMAC_05803	scaffold_63	Expect = 0.0	Expect = 0.0	Expect = 0.0	sp|Q09813	RecName: Full=Putative transcription initiation factor TFIID 111 kDa	Expect = e-129
	no CBP-like HATs
	no SRC1-like HATs
	protein acetyltransferases:
NCU09914.1	acetyltransferase GNAT			SMAC_08520	scaffold_89	Expect = e-106	Expect = e-105	Expect = 2e-99	No hits found
NCU07589.1	acetyltransferase GNAT			SMAC_07295	scaffold_36	Expect = 2e-90	Expect = 1e-95	Expect(2) = 3e-90	sp|P79081	RecName: Full=N-acetyltransferase ats1	Expect = 1e-025
NCU04583.1	acetyltransferase GNAT			SMAC_02751	scaffold_6	Expect = e-104	Expect = e-106	Expect = e-106	sp|P94482	RecName: Full=Uncharacterized N-acetyltransferase ynaD	Expect = 1e-007
NCU11256	acetyltransferase GNAT			SMAC_08307	scaffold_108	Expect = 6e-49			sp|Q8CES0	RecName: Full=N-acetyltransferase MAK3 homolog; AltName:
NCU01276.1	acetyltransferase GNAT			SMAC_03972	scaffold_33	Expect = 7e-92	Expect(2) = e-104	Expect = 6e-55	sp|Q58ED9	RecName: Full=N-acetyltransferase 5	Expect = 2e-036
	histone lysine methyltransferases
NCU04402.1	histone methyltransferase	dim-5	DIM-5	SMAC_07345	scaffold_35	Expect = 0.0	Expect = 0.0	Expect(2) = 0.0	sp|Q8X225	RecName: Full=Histone-lysine N-methyltransferase, H3 lysine-9	Expect = 0.0
NCU01206.1	histone methyltransferase	set-1	SET-1	SMAC_07534	scaffold_101	Expect = 0.0	Expect = 0.0	Expect = 0.0	sp|Q8X0S9	RecName: Full=Histone-lysine N-methyltransferase, H3 lysine-4	Expect = 0.0
NCU00269.1	SET protein	set-2	SET-2	SMAC_06682	scaffold_37	Expect = 0.0	Expect = 0.0	Expect(3) = 0.0	sp|Q7RZU4	RecName: Full=Histone-lysine N-methyltransferase, H3 lysine-36	Expect = 0.0
NCU01932.1	SET protein	set-3	SET-3	SMAC_05383	scaffold_51	Expect = 0.0	Expect = 0.0	Expect = 0.0	sp|Q9VW15	RecName: Full=Histone-lysine N-methyltransferase ash1; AltName:	Expect = 4e-045
NCU04389.1	SET protein	set-4	SET-4	SMAC_01755	scaffold_29	Expect = 0.0	Expect = 0.0	Expect = 0.0	sp|Q3UG20	RecName: Full=Histone-lysine N-methyltransferase MLL5; AltName:	Expect = 3e-027
NCU06119.1	SET protein	set-5	SET-5	SMAC_06401	scaffold_96	Expect = e-119	Expect = e-121	Expect = 3e-87	sp|Q96KQ7	RecName: Full=Histone-lysine N-methyltransferase, H3 lysine-9	Expect = 1e-008
NCU09495.1	SET protein	set-6	SET-6	SMAC_08199	scaffold_10	Expect = e-164	Expect = e-157	Expect = e-157	sp|O74467	RecName: Full=SET domain-containing protein 5	Expect = 2e-035
NCU07496.1	SET protein	set-7	SET-7	SMAC_01115	scaffold_17			Expect = 5e-23	No hits found
NCU01973.1	SET protein	set-8	SET-8	SMAC_05417	scaffold_51	Expect = 0.0	Expect = 0.0	Expect = 0.0	sp|Q55F68	RecName: Full=Adenylate cyclase, terminal-differentiation specific;	Expect = 2e-035
	SET protein
NCU06266.1	DOT1 homolog	dot-1	DOT-1	SMAC_00083	scaffold_7	Expect = 0.0	Expect = 0.0	Expect(2) = 0.0	sp|Q7SB74	RecName: Full=Histone-lysine N-methyltransferase, H3 lysine-79	Expect = 0.0
	histone arginine methyltransferases
NCU07459.1	most closely related to CARM1, closer to PRMT2	prmt-1	PRMT-1	SMAC_05186	scaffold_52	Expect = 0.0	Expect = 0.0	Expect = 3e-88	sp|Q9URX7	RecName: Full=Probable protein arginine N-methyltransferase	Expect = e-116
	missing	prmt-2	PRMT-2
NCU01669.1	carm, e-32	prmt-3	PRMT-3	SMAC_02391	scaffold_14	Expect = 0.0	Expect = 0.0	Expect(2) = 0.0	sp|O13648	RecName: Full=Ribosomal protein arginine N-methytransferase rmt3	Expect = 1e-094
	CARM1/PRMT4 missing	prmt-4	PRMT-4
NCU01613.1		pp-2/prmt-5	PP-2/PRMT-5	SMAC_02353	scaffold_14	Expect = 0.0	Expect = 0.0	Expect = 0.0	sp|P78963	RecName: Full=Protein arginine N-methyltransferase skb1; AltName:	Expect = e-108
	histone kinases
NCU04566.1	Sc Snf1	snf-1		SMAC_06076	scaffold_21	Expect = 0.0	Expect = 0.0	Expect(2) = 0.0	No hits found
EAA27512	Snf4	NCU01471.1		SMAC_07041	scaffold_19	Expect = 0.0	Expect = 0.0	Expect(3) = e-164	sp|Q9P869	RecName: Full=Nuclear protein SNF4	Expect = 1e-096
EAA31360	Gal83	NCU03837.1		SMAC_02677	scaffold_6	Expect = 0.0	Expect = 0.0	Expect(3) = 0.0	sp|Q04739	RecName: Full=SNF1 protein kinase subunit beta-3; AltName:	Expect = 6e-027
NCU00108.1 hypothetical protein	Ipl1/aurora kinase			SMAC_08093	scaffold_50	Expect = 0.0	Expect = 0.0	Expect = 0.0	sp|O59790	RecName: Full=Serine/threonine-protein kinase ark1; AltName:	Expect = e-105
EAA36051.1|	nim-A	nim-1NCU03187.1	NIM-1	SMAC_02908	scaffold_31	Expect = 0.0	Expect = 0.0	Expect = 0.0	sp|P48479	RecName: Full=G2-specific protein kinase nim-1	Expect = 0.0
NCU02814.1	DLK/ZIP	prd-4		SMAC_00634	scaffold_7	Expect = 0.0	Expect = 0.0	Expect(2) = 0.0	sp|P34101	RecName: Full=Probable serine/threonine-protein kinase fhkC;	Expect = 5e-077
	histone phosphatases
NCU00043.1	PPP-1			SMAC_00134	scaffold_7	Expect = 0.0	Expect = 0.0	Expect(2) = e-167	sp|Q9UW86	RecName: Full=Serine/threonine-protein phosphatase PP1	Expect = 0.0
NCU01433.1	PPT-1			SMAC_04499	scaffold_142	Expect = 0.0	Expect = 0.0	Expect(3) = 0.0	sp|O43049	RecName: Full=Serine/threonine-protein phosphatase T; Short=PPT	Expect = e-148
NCU03786.1	PP2A, reg. subunit B class			SMAC_02633	scaffold_6	Expect = 0.0	Expect = 0.0	Expect(4) = 0.0	sp|Q14738	RecName: Full=Serine/threonine-protein phosphatase 2A 56 kDa	Expect = e-161
NCU06563.1	PP2A			SMAC_04678	scaffold_58	Expect = 0.0	Expect = 0.0	Expect = e-136	sp|Q10298	RecName: Full=Putative serine/threonine-protein phosphatase	Expect = e-125
NCU08268.1	PP2A subunit			SMAC_00948	scaffold_17	Expect = 0.0	Expect = 0.0	Expect = 0.0	sp|Q9Y7T1	RecName: Full=Uncharacterized protein C63.05	Expect = 3e-037
NCU06630.1	PP2A, cat. subunit			SMAC_04756	scaffold_58	Expect = 0.0	Expect = 0.0	Expect(2) = e-126	sp|P48580	RecName: Full=Serine/threonine-protein phosphatase PP2A catalytic	Expect = 0.0
NCU07489.1	PPZ			SMAC_08068	scaffold_41	Expect = 0.0	Expect = 0.0	Expect(2) = 0.0	sp|P78968	RecName: Full=Serine/threonine-protein phosphatase PP-Z	Expect = e-160
	telomere-associated proteins
NCU04079.1	RAP-1-like	rap-1		SMAC_00664	scaffold_17	Expect = 0.0	Expect = 0.0	Expect = 0.0	sp|Q9UPS6	RecName: Full=Histone-lysine N-methyltransferase SETD1B; AltName:	Expect = 6e-017
other proteins with domains important for chromatin metabolism
	bromodomain (excluding crf, chromatin remodelling factor with bromodomain)
NCU02354.1	Polybromo with 2 bromo- and 1 BAH domains	pbd-1	PBD-1	SMAC_03530	scaffold_9	Expect = 0.0	Expect = 0.0	Expect(2) = 0.0	sp|P53236	RecName: Full=Chromatin structure-remodeling complex subunit RSC1;	Expect = 6e-080
NCU02078.1	Polybromo with 2 bromodomains	pbd-2	PBD-2	SMAC_04975	scaffold_3	Expect = 0.0	Expect = 0.0	Expect = 0.0	sp|Q90941	RecName: Full=Protein polybromo-1	Expect = 8e-011
NCU08809.1	BROMO	bdp-1		SMAC_09465	scaffold_105	Expect = 0.0	Expect = 0.0	Expect(2) = 0.0	sp|Q54BA2	RecName: Full=Ankyrin repeat, bromo and BTB domain-containing	Expect = 2e-016
NCU02276.1	BROMO	bdp-2		SMAC_03720	scaffold_9	Expect = 0.0	Expect = 0.0	Expect = 0.0	sp|P87152	RecName: Full=Bromodomain-containing protein C25H2.11c	Expect = e-102
NCU08423.1	BROMO	bdp-3		SMAC_08132	scaffold_114	Expect = e-106	Expect = e-171	Expect = e-147	sp|Q2T9N0	RecName: Full=Fibrous sheath CABYR-binding protein	Expect = 4e-027
	DNA binding protein involved in repair, cell cycle control, apoptosis
NCU08852.1	poly (ADP-ribose) polymerase	parp-1	PARP	SMAC_07943	scaffold_62	Expect = 0.0	Expect = 0.0	Expect(3) = 0.0	sp|Q11207	RecName: Full=Poly [ADP-ribose] polymerase 2; Short=PARP-2;	Expect = 1e-078
	chromodomain (excluding chd-1 and chd-2, chromatin remodelling factors with chromodomains)
NCU01522.1	chromodomain	cdp-3	CDP-3	SMAC_06208	scaffold_74	Expect = 0.0	Expect = 0.0	Expect = 0.0	sp|Q10103	RecName: Full=Chromo domain-containing protein 1	Expect = 1e-009
NCU11326	chromodomain	cdp-1	CDP-1	SMAC_01634	scaffold_4	Expect = e-117			sp|P12036
NCU04017.1	chromo- and chromoshadow domain	hpo	HPO	SMAC_06192	scaffold_92	Expect = e-123	Expect = e-143	Expect(2) = e-114	sp|P40381	RecName: Full=Chromatin-associated protein swi6	Expect = 2e-019
NCU00738.1	chromodomain	cdp-2	CDP-2	SMAC_01419	scaffold_4	Expect = 0.0	Expect = 0.0	Expect = 0.0	No hits found
NCU06419.1	chromodomain (annotation wrong)	cdp-5		SMAC_02183	scaffold_16	Expect = 0.0	Expect = 0.0	Expect(3) = 0.0	sp|P32490	RecName: Full=MAP kinase kinase MKK1/SSP32	Expect = 3e-091
	other HP1 homologs
NCU05530.1	chromodomain	cdp-4		SMAC_03249	scaffold_2	Expect = 1e-26	Expect = 2e-71	Expect = 3e-40	sp|Q8T6B4	RecName: Full=ABC transporter F family member 4	Expect = 5e-012
NCU06788.1	chromodomain (MOF-like)	cdp-6		SMAC_06778	scaffold_90	Expect = 8e-73	Expect = 1e-73	Expect = 6e-75	sp|Q5BBV4	RecName: Full=Chromatin modification-related protein eaf3	Expect = 7e-031
NCU06787.1	perhaps in HDAC-complex	cdp-6		SMAC_06777	scaffold_90	Expect = 0.0	Expect = 0.0	Expect = 2e-90	sp|Q4WPW2	RecName: Full=Chromatin modification-related protein eaf3	Expect = 3e-052
chromatin/chromosome maintenance
	structural maintenance of chromosomes
NCU01323.1	SMC1	smc-1		SMAC_04013	scaffold_33	Expect = 0.0	Expect = 0.0	Expect = 0.0	sp|O94383	RecName: Full=Structural maintenance of chromosomes protein 1;	Expect = 0.0
NCU07679.1	SMC2	smc-2		SMAC_00874	scaffold_17	Expect = 0.0	Expect = 0.0	Expect = 0.0	sp|P41003	RecName: Full=Structural maintenance of chromosomes protein 2;	Expect = 0.0
NCU07554.1	SMC3	smc-3		SMAC_01999	scaffold_29	Expect = 0.0	Expect = 0.0	Expect = 0.0	sp|Q00737	RecName: Full=Chromosome segregation protein sudA; AltName:	Expect = 0.0
NCU09063.1	SMC4	smc-4		SMAC_05932	scaffold_71	Expect = 0.0	Expect = 0.0	Expect = 0.0	sp|Q12267	RecName: Full=Structural maintenance of chromosomes protein 4	Expect = 0.0
NCU03291.1	SCC1	scc-1		SMAC_04566	scaffold_81	Expect = 0.0	Expect = 0.0	Expect = 0.0	sp|P30776	RecName: Full=Cohesin subunit rad21; AltName:	Expect = 6e-042
NCU01247.1	SCC3	scc-3		SMAC_03947	scaffold_33	Expect = 0.0	Expect = 0.0	Expect = 0.0	sp|O13816	RecName: Full=Cohesin subunit psc3; AltName: Full=SCC3 homolog	Expect = 2e-064
NCU00205.1	ESP1, BimB, Cut1	esp-1		SMAC_02224	scaffold_16	Expect = 0.0	Expect = 0.0	Expect = 0.0	sp|P33144	RecName: Full=Separin; AltName: Full=Separase; AltName: Full=Cell	Expect = 0.0
NCU00658.1	ZIP1			SMAC_01339	scaffold_4	Expect = 0.0	Expect = 0.0	Expect = 0.0	sp|Q14789	RecName: Full=Golgin subfamily B member 1; AltName: Full=Giantin;	Expect = e-104
NCU04826.1	SCP1			SMAC_03465	scaffold_2	Expect = 0.0	Expect = 0.0	Expect = 0.0	sp|P35749	RecName: Full=Myosin-11; AltName: Full=Myosin heavy chain 11;	Expect = 3e-056
not found	SCP2
NCU02411.1	SCP3			SMAC_08301	scaffold_108	Expect = 0.0	Expect = 0.0	Expect = 0.0	sp|Q9QXS1	RecName: Full=Plectin-1; AltName: Full=Plectin-6; Short=PLTN;	Expect = 2e-048
	AT-hook proteins (RGRP; bind to minor groove)
NCU01145.1	AT-hook protein	ath-1	ATH-1	SMAC_03216	scaffold_20	Expect = 1e-52	Expect = 4e-77	Expect = 2e-67	sp|O08550	RecName: Full=Histone-lysine N-methyltransferase MLL4; AltName:	Expect = 8e-013
NCU05250.1	AT-hook protein			SMAC_01734	scaffold_29	Expect = 0.0	Expect = 0.0	Expect = 0.0	sp|Q00333	RecName: Full=Protein rad9; AltName: Full=SCC2 homolog	Expect = 3e-085
NCU09609.1	AT-hook protein			SMAC_08905	scaffold_124	Expect = 0.0	Expect = 0.0	Expect(2) = 0.0	sp|Q9USR9	RecName: Full=Centromere protein 3; AltName: Full=CENP-C homolog	Expect = 1e-024
NCU06907.1	AT-hook protein with Zn fingers			SMAC_05878	scaffold_71	Expect = 0.0	Expect = 0.0	Expect = 0.0	sp|O14258	RecName: Full=Metallothionein expression activator	Expect = 1e-027
	Replication
NCU01871.1	replication-licensing factor			SMAC_06840	scaffold_27	Expect = 3e-80	Expect = 1e-93	Expect = 4e-65	sp|Q9UUD1	RecName: Full=Sterol regulatory element-binding protein 1;	Expect = 8e-020
	base excision repair
NCU02035.1	endonuclease-like	hhh-1 changed to NCU02034.3		SMAC_05479	scaffold_51	Expect = 0.0	Expect(2) = 0.0	Expect(2) = 0.0	sp|Q9SJQ6	RecName: Full=Protein ROS1; AltName: Full=Repressor of silencing 1;	Expect = 2e-008	>ref|XP_964657.1| hypothetical protein NCU02035 [Neurospora crassa OR74A]	[Neurospora crassa OR74A]	Expect = 0.0
NCU03040.1	8-oxoguanine glycosylase			SMAC_00422	scaffold_7	Expect = 0.0	Expect = 0.0	Expect = 0.0	sp|O70249	RecName: Full=N-glycosylase/DNA lyase; Includes: RecName:	Expect = 7e-056
	putative AT-hook proteins (no RGRP but good surrounding sequence)
NCU01344.1	putative AT-hook protein			SMAC_04033	scaffold_33	Expect = e-163	Expect = 0.0	Expect = 0.0	sp|Q9UUB5	RecName: Full=Kinetochore protein mis13; AltName: Full=NMS complex	Expect = 2e-021
NCU00980.1	putative AT-hook protein			SMAC_00257	scaffold_7	Expect = e-180	Expect = 0.0	Expect = 0.0	sp|P06843	RecName: Full=Protein SPT2; AltName: Full=Negative regulator of Ty	Expect = 3e-011
NCU02068.1	putative AT-hook and BRCT domain			SMAC_04964	scaffold_3	Expect = 0.0	Expect = 0.0	Expect = 0.0	sp|Q7M732	RecName: Full=Retrotransposon-like protein 1; AltName:	Expect = 8e-022
NCU04394.1	putative AT-hook protein			SMAC_07360	scaffold_35		Expect = 1e-51	Expect(2) = 1e-56	sp|P48988	RecName: Full=Major centromere autoantigen B; Short=Centromere	Expect = 8e-019
NCU06737.1	putative AT-hook protein			SMAC_06727	scaffold_90	Expect = 0.0	Expect = 0.0	Expect = 0.0	sp|P02812	RecName: Full=Basic salivary proline-rich protein 2; Short=Salivary	Expect = 9e-015
NCU07952.1	putative AT-hook protein with Zn finger			SMAC_08565	scaffold_18	Expect = 0.0	Expect = 0.0	Expect = 0.0	sp|P53968	RecName: Full=Transcriptional regulator CRZ1	Expect = 6e-040
NCU05672.1	putative AT-hook protein			none
	homeobox proteins
NCU03593.1	microconidiogenesis	kal-1		SMAC_03124	scaffold_20	Expect = 0.0	Expect = 0.0	Expect(3) = 0.0	sp|Q99160	RecName: Full=Homeobox protein HOY1	Expect = 1e-014
NCU03266.1	HOX box			SMAC_02983	scaffold_31	Expect = 0.0	Expect = 0.0	Expect = 0.0	sp|Q566X8	RecName: Full=Diencephalon/mesencephalon homeobox protein 1-B	Expect = 5e-009
NCU03070.1	HOX box			SMAC_02800	scaffold_31	Expect = 0.0	Expect = 0.0	Expect(2) = 0.0	sp|O54751	RecName: Full=Cone-rod homeobox protein	Expect = 7e-009
RNA-mediated silencing
	RNA-dependent RNA polymerase
NCU07534.1	qde-1	qde-1		SMAC_02019	scaffold_29	Expect = 0.0	Expect = 0.0	Expect = 0.0	sp|Q8LHH9	RecName: Full=Probable RNA-dependent RNA polymerase SHL2; AltName:	Expect = 3e-019
NCU02178.1	Sad-1	sad-1		SMAC_05269	scaffold_52	Expect = 0.0	Expect = 0.0	Expect = 0.0	sp|O14227	RecName: Full=RNA-dependent RNA polymerase 1; Short=Protein rdp1	Expect = e-139
NCU08435.1	rrp-3	rrp-3		SMAC_00026	scaffold_7	Expect = 0.0	Expect = 0.0	Expect = 0.0	sp|Q7XM31	RecName: Full=Probable RNA-dependent RNA polymerase 2; Short=OsRDR2	Expect = 8e-073
	Argonaute homologs
NCU04730.1	qde-2	qde-2		SMAC_03832	scaffold_39	Expect = 0.0	Expect = 0.0	Expect = 0.0	sp|Q9SJK3	RecName: Full=Argonaute-like protein At2g27880	Expect = 8e-077
NCU09434.1	sms-2	sms-2		SMAC_08605	scaffold_72	Expect = 0.0	Expect = 0.0	Expect = 0.0	sp|O74957	RecName: Full=Protein argonaute; AltName: Full=Eukaryotic	Expect = e-105
	ReqQ helicase homologs
NCU08598.1	qde-3	qde-3		SMAC_04895	scaffold_40	Expect = 0.0	Expect = 0.0	Expect = 0.0	sp|Q09811	RecName: Full=ATP-dependent DNA helicase hus2/rqh1	Expect = e-135
NCU03337.1	qde-3h/rqh-2	recQ-2		SMAC_04096	scaffold_57	Expect = e-146	Expect = e-143	Expect(3) = e-145	sp|Q9DEY9	RecName: Full=Bloom syndrome protein homolog; Short=xBLM	Expect = 3e-071
	Dicer Rnase homologs
NCU08270.1	dcl-1	sms-3		SMAC_00946	scaffold_17	Expect = 0.0	Expect = 0.0	Expect = 0.0	sp|Q7S8J7	RecName: Full=Dicer-like protein 1; Includes: RecName:	Expect = 0.0
NCU06766.1	dcl-2	dcl-2		SMAC_06757	scaffold_90	Expect = 0.0	Expect = 0.0	Expect(2) = 0.0	sp|Q7SCC1	RecName: Full=Dicer-like protein 2; Includes: RecName:	Expect = 0.0
NCU01762.1	Ribonuclease III-like			SMAC_02447	scaffold_14	Expect = e-179	Expect = e-174	Expect = e-174	sp|Q02555	RecName: Full=Ribonuclease 3; AltName: Full=Ribonuclease III;	Expect = 3e-018
	DEAD-box RNA helicases
NCU05802.1	most homeless-like RNA helicase A			SMAC_07645	scaffold_8	Expect = 0.0	Expect = 0.0	Expect = 0.0	sp|Q7Z478	RecName: Full=ATP-dependent RNA helicase DHX29; AltName: Full=DEAH	Expect = e-173
NCU01143.1	most homeless-like RNA helicase A			SMAC_03214	scaffold_20	Expect = 0.0	Expect = 0.0	Expect = 0.0	sp|O94536	RecName: Full=Putative ATP-dependent RNA helicase ucp12	Expect = 0.0
NCU01612.1	PRP16			SMAC_02354	scaffold_14	Expect = 0.0	Expect = 0.0	Expect = 0.0	sp|O42945	RecName: Full=Probable pre-mRNA-splicing factor ATP-dependent RNA	Expect = 0.0
NCU02728.1	similar to PRP16			SMAC_04290	scaffold_12	Expect = 0.0	Expect = 0.0	Expect = 0.0	sp|Q9P774	RecName: Full=Pre-mRNA-splicing factor ATP-dependent RNA helicase	Expect = 0.0
NCU06318.1				SMAC_01032	scaffold_17	Expect = 0.0	Expect = 0.0	Expect = 0.0	sp|Q14562	RecName: Full=ATP-dependent RNA helicase DHX8; AltName: Full=DEAH box	Expect = 0.0
NCU03363.1	mtr4	frh		SMAC_04070	scaffold_57	Expect = 0.0	Expect = 0.0	Expect = 0.0	sp|O14232	RecName: Full=Uncharacterized helicase C6F12.16c	Expect = 0.0
	RITS complex
no match	SpTas3
no match	SpChp1
	other RNA binding proteins
NCU03897.1	ddp-1	ddp-1	DDP-1	SMAC_06322	scaffold_68	Expect = 0.0	Expect = 0.0	Expect = 0.0	sp|O59810	RecName: Full=KH domain-containing protein C550.14	Expect = e-123
	Ku proteins
NCU08290.1	ku70	mus-51		SMAC_00927	scaffold_17	Expect = 0.0	Expect = 0.0	Expect = 0.0	sp|Q7SA95	RecName: Full=ATP-dependent DNA helicase II subunit 1; AltName:	Expect = 0.0
NCU00077.1	ku80	mus-52		SMAC_00164	scaffold_7	Expect = 0.0	Expect = 0.0	Expect(4) = 0.0	sp|Q7RX73	RecName: Full=ATP-dependent DNA helicase II subunit 2; AltName:	Expect = 0.0
NCU06264		mus-53		SMAC_00082	scaffold_7	Expect = 0.0	Expect = 0.0	Expect = 0.0	sp|Q10327	RecName: Full=Uncharacterized protein C32A11.02c	Expect = 2e-082

## Sheet: CentromereProteins
					pep blastp	cds blastx	genes blastx	pep blastp against Swissprot
Sordaria #	scaffold/contig	Neurospora	Protein	Homologs	e-value blastp	e-value blastx	e-value blastx	best hit acc. no.	best hit name
SMAC_00255	scaffold_7	NCU00978	XP_325158.1	Mps1p	Expect = 0.0	Expect = 0.0	Expect = 0.0	sp|P54199	RecName: Full=Serine/threonine-protein kinase MPS1; AltName:
SMAC_00349	scaffold_7	NCU07400	XP_327686.1	Bik1p	Expect = 0.0	Expect = 0.0	Expect = 0.0	sp|P28023	RecName: Full=Dynactin subunit 1; AltName: Full=150 kDa
SMAC_00378	scaffold_7	NCU10043	XP_323162.1	Bub1p/Mad3	Expect = 0.0	Expect = 0.0	Expect = 0.0	sp|P41695	RecName: Full=Checkpoint serine/threonine-protein kinase BUB1
SMAC_01182	scaffold_17	NCU04428	XP_323781.1	Mad1p	Expect = 0.0	Expect = 0.0	Expect = 0.0	sp|Q6C452	RecName: Full=Spindle assembly checkpoint component MAD1; AltName:
SMAC_01678	scaffold_29	NCU05312	XP_324669.1	Spc24p	Expect = 4e-59	Expect = 6e-72	Expect = 2e-66	sp|Q7S8M2	RecName: Full=Probable kinetochore protein spc-24
SMAC_01708	scaffold_29	NCU05280	EAA32681.1	Ask1p	Expect = 0.0	Expect = 0.0	Expect = e-145	sp|Q9P6S5	RecName: Full=DASH complex subunit ask1; AltName: Full=Outer
SMAC_01944	scaffold_29	NCU08991	XP_331383.1	Skp1p	Expect = 1e-96	Expect = 5e-96	Expect = 3e-86	sp|Q9Y709	RecName: Full=Suppressor of kinetochore protein 1; AltName:
SMAC_01954	scaffold_29	NCU08999	XP_331391.1	Cbf1p	Expect = e-165	Expect = e-174	Expect(2) = e-168	sp|Q10186	RecName: Full=Uncharacterized bHLH domain-containing protein
SMAC_01981	scaffold_29	NCU07571	XP_327857.1	Nnf1p/Nnf1R	Expect = 2e-88	Expect = e-119	Expect = 9e-58	sp|O77033	RecName: Full=General transcriptional corepressor trfA
SMAC_02279	scaffold_16	NCU00145	XP_322231.1	Cse4p/CENP-A	No hits found	No hits found	Expect = 2e-37	sp|Q7RXR3	RecName: Full=Histone H3-like centromeric protein cse-4; AltName:
SMAC_02483	scaffold_14	NCU01799	EAA27241.1	Dad3p	Expect = 4e-33	Expect = 6e-40	Expect = 5e-41	sp|Q6CKH5	RecName: Full=DASH complex subunit DAD3; AltName: Full=Outer
SMAC_02517	scaffold_14	NCU01841	XP_328280.1	Dad2p	Expect = 1e-60	Expect = 1e-63	Expect = 7e-42	sp|Q6BV14	RecName: Full=DASH complex subunit DAD2; AltName: Full=Outer
SMAC_02693	scaffold_6	NCU01005	XP_326498.1	Fta4	Expect = 6e-89	No hits found	No hits found	No hits found	No hits found
SMAC_02835	scaffold_31	NCU03103	XP_330539.1	Spc105p	Expect = 0.0	Expect = 0.0	Expect(2) = 0.0	sp|O59757	RecName: Full=Kinetochore protein spc7; AltName: Full=NMS complex
SMAC_03192	scaffold_20	NCU01118	CAB88599.2	Sgt1p	Expect = 0.0	Expect = 0.0	Expect = 0.0	sp|Q08446	RecName: Full=Protein SGT1; AltName: Full=Suppressor of G2 allele
SMAC_03375	scaffold_2	NCU04741	EAA31140.1	Duo1p	Expect = 1e-75	Expect = e-108	Expect = 2e-71	sp|O74372	RecName: Full=DASH complex subunit duo1; AltName: Full=Outer
SMAC_03661	scaffold_9	NCU02221	EAA30398.1	Spc34p	Expect = e-111	Expect = e-131	Expect = e-126	No hits found	No hits found
SMAC_03702	scaffold_9	NCU02262	XP_331038.1	Nsl1p/Nsl1R	Expect = 7e-85	Expect = e-114	Expect = 2e-79	No hits found	No hits found
SMAC_04033	scaffold_33	NCU01344	XP_326837.1	Dsn1p	Expect = e-163	Expect = 0.0	Expect = 0.0	sp|Q9UUB5	RecName: Full=Kinetochore protein mis13; AltName: Full=NMS complex
SMAC_04224	scaffold_12	NCU09996	XP_322854.1	CENP-H/Fta3	Expect = 5e-50	Expect = 1e-53	Expect(2) = 4e-75	No hits found	No hits found
SMAC_04455	scaffold_142	NCU04131	XP_323471.1	Ctf3p/CENP-I	Expect = 0.0	Expect = 0.0	Expect(3) = 0.0	sp|P87227	RecName: Full=Inner centromere protein mis6; AltName: Full=Sim4
SMAC_04675	scaffold_58	NCU06568	XP_326423.1	Nuf2p/Nuf2R	Expect = 0.0	Expect = 0.0	Expect = 0.0	sp|Q7S9H0	RecName: Full=Probable kinetochore protein nuf-2
SMAC_04748	scaffold_58	NCU06621	XP_326476.1	Bir1p	Expect = 0.0	Expect = 0.0	Expect = 0.0	sp|O14064	RecName: Full=Protein bir1; AltName: Full=Chromosome segregation
SMAC_04766	scaffold_58	NCU09744	EAA35210.1	Bub3p	Expect = 0.0	Expect = 0.0	Expect = e-134	sp|O43684	RecName: Full=Mitotic checkpoint protein BUB3
SMAC_04881	scaffold_40	NCU09239	XP_331631.1	PCNA	Expect = e-150	Expect = e-143	Expect(2) = e-135	sp|Q03392	RecName: Full=Proliferating cell nuclear antigen; Short=PCNA
SMAC_04884	scaffold_40	NCU09238	XP_331630.1	Sim4	Expect = e-157	Expect = e-167	Expect = e-144	sp|O62537	RecName: Full=Protein hunchback
SMAC_05070	scaffold_56	NCU09696	XP_330346.1	Srp54p	Expect = 0.0	Expect = 0.0	Expect = 0.0	sp|Q00179	RecName: Full=Signal recognition particle 54 kDa protein homolog
SMAC_05235	scaffold_52	NCU09078	XP_331470.1	Hsk3p	Expect = 1e-37	Expect = 3e-57	Expect = 6e-32	sp|O94483	RecName: Full=High osmolarity sensitivity protein 3
SMAC_05255	scaffold_52	NCU09100	XP_331492.1	Mcm21p/Mal2	Expect = e-121	Expect = e-138	Expect = e-135	No hits found	No hits found
SMAC_05745	scaffold_63	NCU02616	XP_331815.1	Cdc20	Expect = 0.0	Expect = 0.0	Expect = 0.0	sp|P78972	RecName: Full=WD repeat-containing protein slp1
SMAC_05914	scaffold_71	NCU06878	EAA29989.1	Dam1p	Expect = 2e-72	Expect(2) = 3e-96	Expect(2) = e-109	sp|Q6C2T8	RecName: Full=DASH complex subunit DAM1; AltName: Full=Outer
SMAC_06093	scaffold_21	NCU04535	XP_323888.1	Stu2p	Expect = 0.0	Expect = 0.0	Expect = 0.0	sp|O94534	RecName: Full=Spindle pole body component alp14; AltName:
SMAC_06324	scaffold_68	NCU03899	XP_323218.1	Ndc80p/Hec1	Expect = 0.0	Expect = 0.0	Expect = 0.0	sp|Q96U60	RecName: Full=Probable kinetochore protein ndc-80
SMAC_06655	scaffold_37	NCU00243	XP_322329.1	Bim1p	Expect = e-120	Expect = e-131	Expect = 7e-95	sp|Q10113	RecName: Full=Microtubule integrity protein mal3
SMAC_06744	scaffold_90	NCU11159	CAD70393.1	Spc25p	Expect = 5e-39	Expect = 2e-83	Expect(2) = e-136	sp|Q873B7	RecName: Full=Probable kinetochore protein spc-25
SMAC_07189	scaffold_47	NCU05211	XP_324568.1	Sli15p	Expect = 0.0	Expect = 0.0	Expect = 0.0	sp|Q1MTN3	RecName: Full=Inner centromere protein-related protein pic1;
SMAC_07296	scaffold_36	NCU07591	XP_328297.1	Fta1	Expect = e-165	Expect = e-169	Expect(2) = e-163	No hits found	No hits found
SMAC_07773	scaffold_5	NCU03537	XP_322795.1	Chl4p	Expect = 0.0	Expect = 0.0	Expect = 0.0	sp|P38907	RecName: Full=Central kinetochore subunit CHL4; AltName:
SMAC_08093	scaffold_50	NCU00108	XP_322194.1	Ipl1p	Expect = 0.0	Expect = 0.0	Expect = 0.0	sp|O59790	RecName: Full=Serine/threonine-protein kinase ark1; AltName:
SMAC_08161	scaffold_10	NCU09468	XP_329827.1	a-tubulin	Expect = 0.0	Expect = 0.0	Expect(3) = e-163	sp|P38669	RecName: Full=Tubulin alpha-B chain
SMAC_08279	scaffold_82	NCU03405	XP_322663.1	Dad1p	Expect = 9e-47	Expect = 6e-50	Expect(2) = 2e-50	sp|Q6BL27	RecName: Full=DASH complex subunit DAD1; AltName: Full=Outer
SMAC_08387	scaffold_133	NCU01413	XP_326906.1	Slk19p	Expect = 5e-30	Expect = 3e-45	Expect = 3e-45	sp|P19837	RecName: Full=Spidroin-1; AltName: Full=Dragline silk fibroin 1
SMAC_08496	scaffold_89	NCU08068	EAA35963.1	Spc19p	Expect = 1e-70	Expect = 8e-95	Expect = 8e-95	sp|Q6BHU0	RecName: Full=DASH complex subunit SPC19; AltName: Full=Outer
SMAC_08883	scaffold_23	NCU06463	XP_326318.1	Mtw1p/Mis12	Expect = e-132	Expect = 0.0	Expect(2) = e-175	sp|P39731	RecName: Full=Kinetochore-associated protein MTW1; AltName:
SMAC_08905	scaffold_124	NCU09609	XP_330259.1	Mif2p/CENP-C	Expect = 0.0	Expect = 0.0	Expect(2) = 0.0	sp|Q9USR9	RecName: Full=Centromere protein 3; AltName: Full=CENP-C homolog
SMAC_09019	scaffold_131	NCU05781	XP_325636.1	Mad2p	Expect = e-109	Expect = e-117	Expect(2) = e-108	sp|O14417	RecName: Full=Mitotic spindle checkpoint component mad2
No hits found		NCU10897	AABX01000214.16	Dad4p	No hits found	No hits found	No hits found	No hits found	No hits found
centromere-associated proteins
No hits found		NCU00996	centromere protein CENP-B	abp-1
SMAC_01944	scaffold_29	NCU08991.1	CBF3 Skp1	scon-3
SMAC_01954	scaffold_29	NCU08999.1	Sc Cbf1
SMAC_03984	scaffold_33	NCU01290.1	CBF5 (nucleolar protein)
SMAC_04341	scaffold_12	NCU02684.1	PWWP domain (in Dnmt3), Ioc4p	crf4-3	Expect = 0.0	Expect = 0.0	Expect(3) = 0.0	sp|O94312	RecName: Full=PWWP domain-containing protein C215.07c	Expect = 8e-036
SMAC_04463	scaffold_142	NCU04124.1	Sc CENP-E-like (not real?)
SMAC_05735	scaffold_63	NCU02626.1	centromere protein CENP-E (kinesin)
