# Supplementary material for: De novo Assembly of a 40 Mb Eukaryotic Genome from Short Sequence Reads: Sordaria macrospora, a Model Organism for Fungal Morphogenesis
Source: PLoS Genet. 2010 Apr 8;6(4):e1000891. doi: 10.1371/journal.pgen.1000891 (PMC2851567; doi:10.1371/journal.pgen.1000891)
Supplement: Table S15 — Known and putative meiosis genes. (0.09 MB XLS) [file pgen.1000891.s027.xls]

## Sheet: meiosis
Known and putative meiosis genes in S. macrospora.
Sheet 1: meiosis, sheet 2: cohesion, sheet 3: segregation, sheet 4: regulation
Gene	Proteins used in blastp	Saccharomyces cerevisiae Database Description (SGD)	Sordaria macrospora		N.c ortholog	P.a. ortholog
			Locus_tag	Scaffold
DSB generation
SPO11	YHL022C SPAC17A5.11	Meiosis-specific protein that initiates meiotic recombination by catalyzing the formation of double-strand breaks in DNA via a transesterification reaction; required for homologous chromosome pairing and synaptonemal complex formation	SMAC_03194 AAQ02689	20	NCU01120	Pa_2_7480
REC107/MEI2	YJR021C	Protein involved in early stages of meiotic recombination; involved in coordination between the initiation of recombination and the first division of meiosis; part of a complex (Rec107p-Mei4p-Rec114p) required for DS break formation	-	-	-	-
MEI4	YER044C-A	Meiosis-specific protein involved in recombination; required for chromosome synapsis; required for production of viable spores	-	-	-	-
REC102	YLR329W	Protein involved in early stages of meiotic recombination; required for chromosome synapsis; forms a complex with Rec104p and Spo11p necessary during the initiation of recombination	-	-	-	-
REC104	YHR157W	Protein involved in early stages of meiotic recombination; required for meiotic crossing over; forms a complex with Rec102p and Spo11p necessary during the initiation of recombination	-	-	-	-
REC114	YMR133W SPCC1753.03c	Protein involved in early stages of meiotic recombination; possibly involved in the coordination of recombination and meiotic division; mutations lead to premature initiation of the first meiotic division	-	-	-	-
SKI8	YGL213C	Protein involved in exosome mediated 3' to 5' mRNA degradation and translation inhibition of non-poly(A) mRNAs as well as double-strand break formation during meiotic recombination; required for repressing propagation of dsRNA viruses	SMAC_07252 AAQ72360	98	NCU03517	Pa_3_5740
MER1	YNL210W	Protein with RNA-binding motifs required for meiosis-specific mRNA splicing; required for chromosome pairing and meiotic recombination	-	-	-	-
HFM1/MER3	YGL251C	Meiosis specific DNA helicase involved in the conversion of double-stranded breaks to later recombination intermediates and in crossover control; catalyzes the unwinding of Holliday junctions; has ssDNA and dsDNA stimulated ATPase activity	SMAC_03814 ACL68183	39	NCU09793	Pa_4_4960
NAM8/MRE2	YHR086W	RNA binding protein, component of the U1 snRNP protein; mutants are defective in meiotic recombination and in formation of viable spores, involved in the formation of DSBs through meiosis-specific splicing of MER2 pre-mRNA	SMAC_04409	142	NCU04182	Pa_1_5920
Removal of Spo11
MRE11	YMR224C	Subunit of a complex with Rad50p and Xrs2p (RMX complex) that functions in repair of DNA double-strand breaks and in telomere stability, exhibits nuclease activity that appears to be required for RMX function; widely conserved	SMAC_00050	7	NCU08730 Rad32	Pa_6_11830
RAD50	YNL250W	Subunit of MRX complex, with Mre11p and Xrs2p, involved in processing double-strand DNA breaks in vegetative cells, initiation of meiotic DSBs, telomere maintenance, and nonhomologous end joining	SMAC_00184	7	NCU00901	Pa_1_1880
XRS2/NBS1	YDR369C SPBC6B1.09c	Protein required for DNA repair; component of the Mre11 complex, which is involved in double strand breaks, meiotic recombination, telomere maintenance, and checkpoint signaling	SMAC_05558	22	NCU04329	Pa_2_12830
SAE2/COM1	YGL175C	Protein with a role in accurate meiotic and mitotic double-strand break repair; phosphorylated in response to DNA damage and required for normal resistance to DNA-damaging agents	-	-	-	-
Strand invasion
RAD51	YER095W NCU02741.1	Strand exchange protein, forms a helical filament with DNA that searches for homology; involved in the recombinational repair of double-strand breaks in DNA during vegetative growth and meiosis; homolog of Dmc1p and bacterial RecA protein	SMAC_04277	12	NCU02741	Pa_1_13570
DMC1	YER179W SPAC8E11.03c	Meiosis-specific protein required for repair of double-strand breaks and pairing between homologous chromosomes; homolog of Rad51p and the bacterial RecA protein	-	-	-	-
RAD52	YML032C NCU04275.1	Protein that stimulates strand exchange by facilitating Rad51p binding to single-stranded DNA; anneals complementary single-stranded DNA; involved in the repair of double-strand breaks in DNA during vegetative growth and meiosis	SMAC_07845	61	NCU04275	Pa_2_12450
RAD54	YGL163C NCU02348.1	DNA-dependent ATPase, stimulates strand exchange by modifying the topology of double-stranded DNA; involved in the recombinational repair of double-strand breaks in DNA during vegetative growth and meiosis; member of the SWI/SNF family	SMAC_03537	9	NCU11255	Pa_5_6320
RDH54	YBR073W	DNA-dependent ATPase, stimulates strand exchange by modifying the topology of double-stranded DNA; involved in recombinational repair of DNA double-strand breaks during mitosis and meiosis; proposed to be involved in crossover interference	-	-	-	-
RFA1	YAR007C NCU03606.1	Subunit of heterotrimeric Replication Protein A (RPA), which is a highly conserved single-stranded DNA binding protein involved in DNA replication, repair, and recombination	SMAC_03113	20	NCU03606	Pa_2_1130
RFA2	YNL312W NCU07717.1	Subunit of heterotrimeric Replication Protein A (RPA), which is a highly conserved single-stranded DNA binding protein involved in DNA replication, repair, and recombination	SMAC_04802	58	NCU07717	Pa_6_3040
RFA3	YJL173C	Subunit of heterotrimeric Replication Protein A (RPA), which is a highly conserved single-stranded DNA binding protein involved in DNA replication, repair, and recombination	-	-	-	-
SAE3	YHR079C-A	Meiosis specific protein involved in DMC1-dependent meiotic recombination, forms heterodimer with Mei5p; proposed to be an assembly factor for Dmc1p	-	-	-	-
RAD55	YDR076W	Protein that stimulates strand exchange by stabilizing the binding of Rad51p to single-stranded DNA; involved in the recombinational repair of double-strand breaks in DNA during vegetative growth and meiosis; forms heterodimer with Rad57p	SMAC_09460	105	NCU08806	Pa_1_22940
RAD57	YDR004W	Protein that stimulates strand exchange by stabilizing the binding of Rad51p to single-stranded DNA; involved in the recombinational repair of double-strand breaks in DNA during vegetative growth and meiosis; forms heterodimer with Rad55p	SMAC_02455	14	NCU01771	Pa_3_7770
DNA damage checkpoint
PCH2	YBR186W	Nucleolar component of the pachytene checkpoint, which prevents chromosome segregation when recombination and chromosome synapsis are defective; also represses meiotic interhomolog recombination in the rDNA	-	-	-	-
MEC1	YBR136W	Genome integrity checkpoint protein and PI kinase superfamily member; signal transducer required for cell cycle arrest and transcriptional responses prompted by damaged or unreplicated DNA; monitors and participates in meiotic recombination	SMAC_01337	4	NCU00274	Pa_1_14870
RAD17	YOR368W	Checkpoint protein, involved in the activation of the DNA damage and meiotic pachytene checkpoints; with Mec3p and Ddc1p, forms a clamp that is loaded onto partial duplex DNA; homolog of human and S. pombe Rad1 and U. maydis Rec1 proteins	SMAC_00450	7	NCU00517	Pa_1_18620
RAD1	YPL022W	Single-stranded DNA endonuclease (with Rad10p), cleaves single-stranded DNA during nucleotide excision repair and double-strand break repair; subunit of Nucleotide Excision Repair Factor 1 (NEF1); homolog of human XPF protein	SMAC_00217	7	NCU00942	Pa_1_3480
RAD24	YER173W	Checkpoint protein, involved in the activation of the DNA damage and meiotic pachytene checkpoints; subunit of a clamp loader that loads Rad17p-Mec3p-Ddc1p onto DNA; homolog of human and S. pombe Rad17 protein	-	-	-	-
DDC1	YPL194W	DNA damage checkpoint protein, part of a PCNA-like complex required for DNA damage response, required for pachytene checkpoint to inhibit cell cycle in response to unrepaired recombination intermediates; potential Cdc28p substrate	-	-	-	-
Regulation of crossover frequency
MLH1	YMR167W	Protein required for mismatch repair in mitosis and meiosis as well as crossing over during meiosis; forms a complex with Pms1p and Msh2p-Msh3p during mismatch repair; human homolog is associated with hereditary non-polyposis colon cancer	SMAC_00910 ACL68184	17	NCU08309	Pa_6_2940
MLH3	YPL164C	Protein involved in DNA mismatch repair and crossing-over during meiotic recombination; forms a complex with Mlh1p; mammalian homolog is implicated mammalian microsatellite instability	SMAC_04137	57	NCU05385	Pa_3_9800
MSH4	YFL003C	Protein involved in meiotic recombination, required for normal levels of crossing over, colocalizes with Zip2p to discrete foci on meiotic chromosomes, has homology to bacterial MutS protein	SMAC_01471 ACL68185	4	NCU10895	Pa_1_5720
MSH5	YDL154W	Protein of the MutS family, forms a dimer with Msh4p that facilitates crossovers between homologs during meiosis; msh5-Y823H mutation confers tolerance to DNA alkylating agents; homologs present in C. elegans and humans	SMAC_04248	12	NCU09384	Pa_1_13960
SGS1	YMR190C	Nucleolar DNA helicase of the RecQ family involved in maintenance of genome integrity, regulates chromosome synapsis and meiotic crossing over; has similarity to human BLM and WRN helicases implicated in Bloom and Werner syndromes	SMAC_04895	40	NCU08598	Pa_1_10750
MEI5	YPL121C	Meiosis specific protein involved in DMC1-dependent meiotic recombination, forms heterodimer with Sae3p; proposed to be an assembly factor for Dmc1p	SMAC_08410	91	NCU10836	Pa_3_2960
MUM2	YBR057C	Cytoplasmic protein essential for meiotic DNA replication and sporulation; interacts with Orc2p, which is a component of the origin recognition complex	-	-	-	-
NDJ1	YOL104C	Meiosis-specific telomere protein, required for bouquet formation, effective homolog pairing, ordered cross-over distribution (interference), sister chromatid cohesion at meiotic telomeres, and segregation of small chromosomes	-	-	-	-
MEI-9 (Drosophila)	FBgn0002707	nucleotide-excision repair; mismatch repair; meiotic chromosome segregation; reciprocal meiotic recombination; resolution of meiotic joint molecules as recombinants; DNA recombination; double-strand break repair; female meiosis chromosome segregation.	SMAC_05209	52	NCU07440	Pa_1_19350
MEI-218 (Drosophila)	FBgn0002709	required for meiotic crossing-over in Drosophila could be required for a molecular transition of the recombination intermediate late in the double strand break repair pathway	-	-	-	-
Rad2	YGR258C	Single-stranded DNA endonuclease, cleaves single-stranded DNA during nucleotide excision repair to excise damaged DNA; subunit of Nucleotide Excision Repair Factor 3 (NEF3); homolog of human XPG protein	SMAC_08059	41	NCU07498	Pa_1_9750
Synaptonemal complex
HOP1	YIL072W	Meiosis-specific DNA binding protein that displays Red1p dependent localization to the unsynapsed axial-lateral elements of the synaptonemal complex; required for homologous chromosome synapsis and chiasma formation	-	-	-	-
HOP2	YGL033W, SPAC222.15	Meiosis-specific protein that localizes to chromosomes, preventing synapsis between nonhomologous chromosomes and ensuring synapsis between homologs; complexes with Mnd1p to promote homolog pairing and meiotic double-strand break repair	-	-	-	-
MND1	YGL183C SPAC13A11.03	Protein required for recombination and meiotic nuclear division; forms a complex with Hop2p, which is involved in chromosome pairing and repair of meiotic double-strand breaks	-	-	-	-
ZIP1	YDR285W NCU00658	Transverse filament protein of the synaptonemal complex; required for normal levels of meiotic recombination and pairing between homologous chromosome during meiosis; potential Cdc28p substrate	-	-	-	-
ZIP2	YGL249W	Meiosis-specific protein involved in normal synaptonemal complex formation and pairing between homologous chromosomes during meiosis	-	-	-	-
ZIP3	YLR394W	SUMO E3 ligase; required for synaptonemal complex formation; localizes to synapsis initiation sites on meiotic chromosomes; potential Cdc28p substrate	-	-	-	-
Zip4	YIL073C	Meiosis-specific protein essential for chromosome synapsis, involved in completion of nuclear divisions during meiosis; induced early in meiosis	SMAC_04082	57	NCU03351	Pa_3_6330
DNA Repair
HTA1	YDR225W SPAC19G12.06c	Histone H2A, core histone protein required for chromatin assembly and chromosome function; one of two nearly identical subtypes (see also HTA2); DNA damage-dependent phosphorylation by Mec1p facilitates DNA repair; acetylated by Nat4p	SMAC_04116	57	NCU05347	Pa_5_5390
HTA2	YBL003C	Histone H2A, core histone protein required for chromatin assembly and chromosome function; one of two nearly identical (see also HTA1) subtypes; DNA damage-dependent phosphorylation by Mec1p facilitates DNA repair; acetylated by Nat4p	SMAC_08324	108	NCU02437	Pa_6_11720
RED1	YLR263W	Protein component of the axial elements of the synaptonemal complex, involved in chromosome segregation during the first meiotic division; interacts with Hop1p; required for wild-type levels of Mek1p kinase activity	-	-	-	-
SMC5	YOL034W	Structural maintenance of chromosomes (SMC) protein; essential subunit of the Mms21-Smc5-Smc6 complex; required for growth and DNA repair; S. pombe homolog forms a heterodimer with S. pombe Rad18p that is involved in DNA repair	SMAC_05226	52	NCU09065	Pa_1_19340
SMC6	YLR383W	Protein involved in structural maintenance of chromosomes; essential subunit of Mms21-Smc5-Smc6 complex; required for growth, DNA repair, interchromosomal and sister chromatid recombination; homologous to S. pombe rad18	SMAC_08292	108	NCU02402	Pa_5_5760
EXO1	YOR033C SPBC29A10.05	5'-3' exonuclease and flap-endonuclease involved in recombination, double-strand break repair and DNA mismatch repair; member of the Rad2p nuclease family, with conserved N and I nuclease domains	SMAC_06425	96	NCU06089	Pa_5_8570
HRR25	YPL204W SPBC3H7.15	Protein kinase involved in regulating diverse events including vesicular trafficking, DNA repair, and chromosome segregation; binds the CTD of RNA pol II; homolog of mammalian casein kinase 1delta (CK1delta)	SMAC_01363	4	NCU00685	Pa_1_18850
RAD23	YEL037C SPBC2D10.12	Protein with ubiquitin-like N terminus, recognizes and binds damaged DNA (with Rad4p) during nucleotide excision repair; regulates Rad4p levels, subunit of Nuclear Excision Repair Factor 2 (NEF2); homolog of human HR23A and HR23B proteins	SMAC_02013	29	NCU07542	Pa_7_7730
Mismatch repair
MSH2	YOL090W	Protein that forms heterodimers with Msh3p and Msh6p that bind to DNA mismatches to initiate the mismatch repair process; contains a Walker ATP-binding motif required for repair activity; Msh2p-Msh6p binds to and hydrolyzes ATP	SMAC_03669	9	NCU02230	Pa_5_9410
MSH3	YCR092C	Mismatch repair protein, forms dimers with Msh2p that mediate repair of insertion or deletion mutations and removal of nonhomologous DNA ends, contains a PCNA (Pol30p) binding motif required for genome stability	SMAC_08039	41	NCU08115	Pa_1_8810
MSH6	YDR097C	Protein required for mismatch repair in mitosis and meiosis, forms a complex with Msh2p to repair both single-base & insertion-deletion mispairs; potentially phosphorylated by Cdc28p	SMAC_03612	9	NCU08135	Pa_5_3880
PMS1	YNL082W	ATP-binding protein required for mismatch repair in mitosis and meiosis; functions as a heterodimer with Mlh1p, binds double- and single-stranded DNA via its N-terminal domain, similar to E. coli MutL	SMAC_04239	12	NCU08020	Pa_6_1450
MLH2	YLR035C	Protein involved in the mismatch repair of certain frameshift intermediates and involved in meiotic recombination; forms a complex with Mlh1p	SMAC_04239	12	NCU09373	Pa_1_14070
Resolution of recombination intermediates
MMS4	YBR098W	Subunit of the structure-specific Mms4p-Mus81p endonuclease that cleaves branched DNA; involved in recombination and DNA repair	SMAC_07114	70	NCU04047	Pa_4_7690
MUS81	YDR386W	Helix-hairpin-helix protein, involved in DNA repair and replication fork stability; functions as an endonuclease in complex with Mms4p; interacts with Rad54p	SMAC_05189	52	NCU07457	Pa_1_9830
SLX1	YBR228W	Subunit of a complex, with Slx4p, that hydrolyzes 5' branches from duplex DNA in response to stalled or converging replication forks; function overlaps with that of Sgs1p-Top3p	SMAC_03937	33	NCU01236	Pa_2_6950
TOP1	YOL006C	Topoisomerase I, nuclear enzyme that relieves torsional strain in DNA by cleaving and re-sealing the phosphodiester backbone; relaxes both positively and negatively supercoiled DNA; functions in replication, transcription, and recombination	SMAC_04614	81	NCU09118	Pa_1_9460
TOP2	YNL088W	Essential type II topoisomerase, relieves torsional strain in DNA by cleaving and re-sealing the phosphodiester backbone of both positively and negatively supercoiled DNA; cleaves complementary strands; localizes to axial cores in meiosis	SMAC_01010	17	NCU06338	Pa_1_22630
TOP3	YLR234W	DNA Topoisomerase III, conserved protein that functions in a complex with Sgs1p and Rmi1p to relax single-stranded negatively-supercoiled DNA preferentially, involved in telomere stability and regulation of mitotic recombination	SMAC_00168	7	NCU00081	Pa_7_9280
SLX4	YLR135W	Subunit of a complex, with Slx1p, that hydrolyzes 5' branches from duplex DNA in response to stalled or converging replication forks; function overlaps with that of Sgs1p-Top3p	-	-	-	-
SLX5	YDL013W	Subunit of the Slx5-Slx8 substrate-specific ubiquitin ligase complex; stimulated by prior attachment of SUMO to the substrate	-	-	-	-
SLX8	YER116C	Subunit of the Slx5-Slx8 substrate-specific ubiquitin ligase complex; stimulated by prior attachment of SUMO to the substrate	SMAC_06687	37	NCU00275	Pa_7_7580
Nonhomologous end joining
YKU70	YMR284W	Subunit of the telomeric Ku complex (Yku70p-Yku80p), involved in telomere length maintenance, structure and telomere position effect; relocates to sites of double-strand cleavage to promote nonhomologous end joining during DSB repair	SMAC_00927 CAJ41424	17	NCU08290	Pa_6_6180
YKU80	YMR106C	Subunit of the telomeric Ku complex (Yku70p-Yku80p), involved in telomere length maintenance, structure and telomere position effect; relocates to sites of double-strand cleavage to promote nonhomologous end joining during DSB repair	SMAC_00164	7	NCU00077	Pa_7_9250
DNL4	YOR005C	DNA ligase required for nonhomologous end-joining (NHEJ), forms stable heterodimer with required cofactor Lif1p, interacts with Nej1p; involved in meiosis, not essential for vegetative growth	SMAC_05315	59	NCU06264	Pa_7_6470
LIF1	YGL090W	Protein involved in DNA double-strand break repair; physically interacts with DNA ligase 4 (Lig4p); homologous to mammalian XRCC4 protein	-	-	-	-
Other
MSC1	YML128C	Protein of unknown function; mutant is defective in directing meiotic recombination events to homologous chromatids; the authentic, non-tagged protein is detected in highly purified mitochondria and is phosphorylated	SMAC_07332	35	NCU04415	Pa_6_1050
MSC7	YHR039C	Protein of unknown function, green fluorescent protein (GFP)-fusion protein localizes to the endoplasmic reticulum; msc7 mutants are defective in directing meiotic recombination events to homologous chromatids	SMAC_05211	52	NCU07442	Pa_1_19220
MSC3	YLR219W	Protein of unknown function, green fluorescent protein (GFP)-fusion protein localizes to the cell periphery; msc3 mutants are defective in directing meiotic recombination events to homologous chromatids; potential Cdc28p substrate	-	-	-	-
MSC6	YOR354C	Protein of unknown function; mutant is defective in directing meiotic recombination events to homologous chromatids; the authentic, non-tagged protein is detected in highly purified mitochondria in high-throughput studies	-	-	-	-
SRS2	YJL092W	DNA helicase and DNA-dependent ATPase involved in DNA repair, needed for proper timing of commitment to meiotic recombination and transition from Meiosis I to II; blocks trinucleotide repeat expansion; affects genome stability	-	-	-	-
MPS3	YJL019W	Nuclear envelope protein required for SPB duplication and nuclear fusion; localizes to the SPB half bridge and at telomeres during meiosis; required with Ndj1p and Csm4p for meiotic bouquet formation and telomere-led rapid prophase movement	-	-	-	-

## Sheet: cohesion
Gene	Proteins used in blastp	Saccharomyces cerevisiae Database Description (SGD)	Sordaria macrospora		N.c ortholog	P.a. ortholog
			Locus_tag	Scaffold
Adherin
SCC2	YDR180W	Subunit of cohesin loading factor (Scc2p-Scc4p), a complex required for loading of cohesin complexes onto chromosomes; involved in establishing sister chromatid cohesion during DSB repair via histone H2AX; evolutionarily-conserved adherin	SMAC_01734	29	NCU05250	Pa_3_4700
SCC4	Yer147c	Subunit of cohesin loading factor (Scc2p-Scc4p), a complex required for the loading of cohesin complexes onto chromosomes; involved in establishing sister chromatid cohesion during double-strand break repair via phosphorylated histone H2AX	-	-	-	-
Chromosome cohesion
SMC1	YFL008W	Subunit of the multiprotein cohesin complex, essential protein involved in chromosome segregation and in double-strand DNA break repair; SMC chromosomal ATPase family member, binds DNA with a preference for DNA with secondary structure	SMAC_04013	33	NCU01323	Pa_2_2750
SMC3	YJL074C SPAC10F6.09c	Subunit of the multiprotein cohesin complex required for sister chromatid cohesion in mitotic cells; also required, with Rec8p, for cohesion and recombination during meiosis; phylogenetically conserved SMC chromosomal ATPase family member	SMAC_01999	29	NCU07554	Pa_7_6980
SCC3	YIL026C	Subunit of the cohesin complex, which is required for sister chromatid cohesion during mitosis and meiosis and interacts with centromeres and chromosome arms, essential for viability	SMAC_03947	33	NCU01247	Pa_2_3220
MCD1/ SCC1/Rad21	YDL003W	Essential subunit of the cohesin complex required for sister chromatid cohesion in mitosis and meiosis; apoptosis induces cleavage and translocation of a C-terminal fragment to mitochondria; expression peaks in S phase	SMAC_04566	81	NCU03291	Pa_1_4290
REC8	YPR007C SPBC29A10.14	Meiosis-specific component of sister chromatid cohesion complex; maintains cohesion between sister chromatids during meiosis I; maintains cohesion between centromeres of sister chromatids until meiosis II; homolog of S. pombe Rec8p	SMAC_02911 ABM69258	31	NCU03291	Pa_1_14580
PDS5/BimD/ Spo76	YMR076C SPAC110	Protein required for establishment and maintenance of sister chromatid condensation and cohesion, colocalizes with cohesin on chromosomes, may function as a protein-protein interaction scaffold; also required during meiosis	SMAC_01862 CAB51808	29	NCU00424	Pa_7_8550
SPO13	YHR014W	Meiosis-specific protein, involved in maintaining sister chromatid cohesion during meiosis I as well as promoting proper attachment of kinetochores to the spindle during meiosis I and meiosis II	-	-	-	-
Securin separase
PDS1	YDR113C	Securin, inhibits anaphase by binding separin Esp1p; blocks cyclin destruction and mitotic exit, essential for meiotic progression and mitotic cell cycle arrest; localization is cell-cycle dependent and regulated by Cdc28p phosphorylation	-	-	-	-
ESP1	YGR098C	Separase, a caspase-like cysteine protease that promotes sister chromatid separation by mediating dissociation of the cohesin Scc1p from chromatin; inhibits protein phosphatase 2A-Cdc55p to promote mitotic exit; inhibited by Pds1p	SMAC_02224	16	NCU00205	Pa_7_10410
Condensin
SMC2	YFR031C	Subunit of the condensin complex; essential SMC chromosomal ATPase family member that forms a complex with Smc4p to form the active ATPase; Smc2p/Smc4p complex binds DNA; required for clustering of tRNA genes at the nucleolus	SMAC_00874	17	NCU07679	Pa_6_3580
SMC4	YLR086W	Subunit of the condensin complex; reorganizes chromosomes during cell division; forms a complex with Smc2p that has ATP-hydrolyzing and DNA-binding activity; required for tRNA gene clustering at the nucleolus; potential Cdc28p substrate	SMAC_05932	71	NCU09063	Pa_5_8760
LRS4	YDR439W	Nucleolar protein that forms a complex with Csm1p, and then Mam1p at kinetochores during meiosis I to mediate accurate homolog segregation; required for condensin recruitment to the replication fork barrier site and rDNA repeat segregation	-	-	-	-
FOB1	YDR110W	Nucleolar protein that binds the rDNA replication fork barrier (RFB) site; required for replication fork blocking, recombinational hotspot activity, condensin recruitment to RFB and rDNA repeat segregation; related to retroviral integrases deletion increase recombinaison	-	-	-	-
Ycs4	YLR272C	Subunit of the condensin complex; required for establishment and maintenance of chromosome condensation, chromosome segregation, chromatin binding of condensin, tRNA gene clustering at the nucleolus, and silencing at the mating type locus	SMAC_08639	103	NCU09297	Pa_5_6550
YCG1/Ycs5	YDR325W	Subunit of the condensin complex; required for establishment and maintenance of chromosome condensation, chromosome segregation and chromatin binding of the condensin complex; required for clustering of tRNA genes at the nucleolus	SMAC_07101	70	NCU06216	Pa_7_10580

## Sheet: segregation
Gene	Proteins used in blastp	Saccharomyces cerevisiae Database Description (SGD)	Sordaria macrospora		N.c ortholog	P.a. ortholog
			Locus_tag	Scaffold
Chromosome segregation
SGO1	YOR073W	Component of the spindle checkpoint, involved in sensing lack of tension on mitotic chromosomes; protects centromeric Rec8p at meiosis I; required for accurate chromosomal segregation at meiosis II and for mitotic chromosome stability	SMAC_04633	81	NCU09137	Pa_1_3690
STU2	YLR045C SPCC736.14	Microtubule-associated protein (MAP) of the XMAP215/Dis1 family; regulates microtubule dynamics during spindle orientation and metaphase chromosome alignment; interacts with spindle pole body component Spc72p	SMAC_06093	21	NCU04535	Pa_5_1040
TID3	YIL144W SPBC11C11.03	Component of the evolutionarily conserved kinetochore-associated Ndc80 complex (Ndc80p-Nuf2p-Spc24p-Spc25p); conserved coiled-coil protein involved in chromosome segregation, spindle checkpoint activity, kinetochore assembly and clustering	SMAC_06324	68	NCU03899	Pa_4_8920
MPC54	YOR177C	Component of the meiotic outer plaque, a membrane-organizing center which is assembled on the cytoplasmic face of the spindle pole body during meiosis II and triggers the formation of the prospore membrane; potential Cdc28p substrate	-	-	-	-
MAM1	YER106W	Monopolin, kinetochore associated protein involved in chromosome attachment to meiotic spindle	SMAC_01821	29	NCU07984	Pa_6_1390
CSM1	YCR086W	Nucleolar protein that forms a complex with Lrs4p which binds Mam1p at kinetochores during meiosis I to mediate accurate chromosome segregation, may be involved in premeiotic DNA replication; possible role in telomere maintenance	SMAC_05932	71	NCU09063	Pa_5_8760
CSM2	YIL132C	Protein required for accurate chromosome segregation during meiosis
CSM3	YMR048W	Protein required for accurate chromosome segregation during meiosis	SMAC_06855	27	NCU01858	Pa_1_22020
CSM4	YPL200W	Protein required for accurate chromosome segregation during meiosis	-	-	-	-
SLK19	YOR195W	Kinetochore-associated protein required for normal segregation of chromosomes in meiosis and mitosis; component of the FEAR regulatory network, which promotes Cdc14p release from the nucleolus during anaphase; potential Cdc28p substrate	-	-	-	-
MPS3	YJL019W	Nuclear envelope protein required for SPB duplication and nuclear fusion; localizes to the SPB half bridge and at telomeres during meiosis; required with Ndj1p and Csm4p for meiotic bouquet formation and telomere-led rapid prophase movement	-	-	-	-
KAR3	YPR141C	Minus-end-directed microtubule motor that functions in mitosis and meiosis, localizes to the spindle pole body and localization is dependent on functional Cik1p, required for nuclear fusion during mating; potential Cdc28p substrate	SMAC_02750	6	NCU04581	Pa_2_3870
TUB1	YML085C	Alpha-tubulin; associates with beta-tubulin (Tub2p) to form tubulin dimer, which polymerizes to form microtubules	SMAC_04628	81	NCU09132	Pa_1_3600
TUB2	YFL037W	Beta-tubulin; associates with alpha-tubulin (Tub1p and Tub3p) to form tubulin dimer, which polymerizes to form microtubules	SMAC_00640	17	NCU03954	Pa_4_7630
TUB3	YML124C	Alpha-tubulin; associates with beta-tubulin (Tub2p) to form tubulin dimer, which polymerizes to form microtubules; expressed at lower level than Tub1p	SMAC_08161	10	NCU09468	Pa_3_10220
CIK1	YMR198W	Kinesin-associated protein required for both karyogamy and mitotic spindle organization, interacts stably and specifically with Kar3p and may function to target this kinesin to a specific cellular role; has similarity to Vik1p	-	-	-	-
UBC11	YOR339C SPCC1259.15c	Ubiquitin-conjugating enzyme most similar in sequence to Xenopus ubiquitin-conjugating enzyme E2-C, but not a true functional homolog of this E2; unlike E2-C, not required for the degradation of mitotic cyclin Clb2	SMAC_04780	58	NCU09731	Pa_1_3960
Anaphase-promoting complex
APC1	YNL172W SPBC106.09	Largest subunit of the Anaphase-Promoting Complex/Cyclosome (APC/C), which is a ubiquitin-protein ligase required for degradation of anaphase inhibitors, including mitotic cyclins, during the metaphase/anaphase transition	SMAC_07506	77	NCU05901	Pa_5_2080
APC5	YOR249C SPAC959.09c	Subunit of the Anaphase-Promoting Complex/Cyclosome (APC/C), which is a ubiquitin-protein ligase required for degradation of anaphase inhibitors, including mitotic cyclins, during the metaphase/anaphase transition	SMAC_05407	51	NCU01963	Pa_1_20560
CDC16	YKL022C SPAC6F12.15c	Subunit of the anaphase-promoting complex/cyclosome (APC/C), which is a ubiquitin-protein ligase required for degradation of anaphase inhibitors, including mitotic cyclins, during the metaphase/anaphase transition; required for sporulation	SMAC_04064	33	NCU01377	Pa_2_8625
CDC20	YGL116W SPAC821.08c	Cell-cycle regulated activator of anaphase-promoting complex/cyclosome (APC/C), which is required for metaphase/anaphase transition; directs ubiquitination of mitotic cyclins, Pds1p, and other anaphase inhibitors; potential Cdc28p substrate	SMAC_05745	63	NCU02616	Pa_1_4590
CDC23	YHR166C SPAC6F12.14	Subunit of the anaphase-promoting complex/cyclosome (APC/C), which is a ubiquitin-protein ligase required for degradation of anaphase inhibitors, including mitotic cyclins, during the metaphase/anaphase transition	SMAC_03243	20	NCU01174	Pa_2_10630
CDC26	YFR036W SPAC23C11.12	Subunit of the Anaphase-Promoting Complex/Cyclosome (APC/C), which is a ubiquitin-protein ligase required for degradation of anaphase inhibitors, including mitotic cyclins, during the metaphase/anaphase transition	-	-	-	-
CDC27	YBL084C SPAC17C9.01c	Subunit of the Anaphase-Promoting Complex/Cyclosome (APC/C), which is a ubiquitin-protein ligase required for degradation of anaphase inhibitors, including mitotic cyclins, during the metaphase/anaphase transition	SMAC_05287	59	NCU00213	Pa_7_2560
DOC1	YGL240W	Processivity factor required for the ubiquitination activity of the anaphase promoting complex (APC), mediates the activity of the APC by contributing to substrate recognition; involved in cyclin proteolysis	SMAC_00051	7	NCU08731	Pa_6_11820
HCT1	YGL003C SPAC144.13c	Cell-cycle regulated activator of the anaphase-promoting complex/cyclosome (APC/C), which directs ubiquitination of cyclins resulting in mitotic exit; targets the APC/C to specific substrates including CDC20, ASE1, CIN8 and FIN1	SMAC_05745	63	NCU02616	Pa_2_2780
AMA1	YGR225W SPAC13G6.08	Activator of meiotic anaphase promoting complex (APC/C); Cdc20p family member; required for initiation of spore wall assembly; required for Clb1p degradation during meiosis	SMAC_02327	14	NCU01572	Pa_3_5480
MFR1	SPBC1198.12	Meiosis-specific activator of the anaphase-promoting complex (APC). Involved in cdc13 degradation, which leads to spore formation	-	-	-	-
SWM1	YDR260C	Subunit of the anaphase-promoting complex, which is an E3 ubiquitin ligase that regulates the metaphase-anaphase transition and exit from mitosis; required for activation of the daughter-specific gene expression and spore wall maturation	-	-	-	-
APC4	YDR118W SPAC19G12.01C	Subunit of the Anaphase-Promoting Complex/Cyclosome (APC/C), which is a ubiquitin-protein ligase required for degradation of anaphase inhibitors, including mitotic cyclins, during the metaphase/anaphase transition	-	-	-	-
MND2	YIR025W	Subunit of the anaphase-promoting complex (APC); needed for meiotic nuclear division	-	-	-	-
MUG55	SPCC1620.04c	Anaphase-Promoting Complex	-	-	-	-

## Sheet: regulation
Gene	Proteins used in blastp	Saccharomyces cerevisiae Database Description (SGD)	Sordaria macrospora		N.c ortholog	P.a. ortholog
			Locus_tag	Scaffold
Transcription factor / Gene regulation
NDT80	YHR124W	Meiosis-specific transcription factor required for exit from pachytene and for full meiotic recombination; activates middle sporulation genes; competes with Sum1p for binding to promoters containing middle sporulation elements (MSE)	SMAC_01666	29	NCU09915	Pa_1_22920
DOT1	YDR440W	Nucleosomal histone H3-Lys79 methylase, associates with transcriptionally active genes, functions in gene silencing at telomeres, most likely by directly modulating chromatin structure and Sir protein localization	SMAC_00083	7	NCU06266	Pa_7_6450
DST1	YGL043W	General transcription elongation factor TFIIS, enables RNA polymerase II to read through blocks to elongation by stimulating cleavage of nascent transcripts stalled at transcription arrest sites	SMAC_05797	63	NCU02563	Pa_1_11140
RES2	SPAC22F3.09c	Required for the initiation of mitotic and premeiotic DNA synthesis. Has an additional role in meiotic division.	-	-	-	-
SIF2	YBR103W	WD40 repeat-containing subunit of the Set3C histone deacetylase complex, which represses early/middle sporulation genes; antagonizes telomeric silencing; binds specifically to the Sir4p N-terminus	-	-	-	-
UME6	YDR207C	Key transcriptional regulator of early meiotic genes, binds URS1 upstream regulatory sequence, couples metabolic responses to nutritional cues with initiation and progression of meiosis, forms complex with Ime1p, and also with Sin3p-Rpd3p	-	-	-	-
ABF1	YKL112W	DNA binding protein with possible chromatin-reorganizing activity involved in transcriptional activation, gene silencing, and DNA replication and repair	-	-	-	-
HOS4	YIL112W	Subunit of the Set3 complex, which is a meiotic-specific repressor of sporulation specific genes that contains deacetylase activity; potential Cdc28p substrate	SMAC_06441	111	NCU00388	Pa_7_2110
REP1	SPBC2D10.06	Transcriptional activator that controls the onset of premeiotic DNA synthesis by regulating res2 and some other factor(s) in a mei2 independent cascade	-	-	-	-
STH1	YIL126W	ATPase component of the RSC chromatin remodeling complex; required for expression of early meiotic genes; essential helicase-related protein homologous to Snf2p	SMAC_05323	59	NCU06488	Pa_7_9570
RME1	YGR044C	Zinc finger protein involved in control of meiosis; prevents meiosis by repressing IME1 expression and promotes mitosis by activating CLN2 expression; directly repressed by a1-a2 regulator; mediates cell type control of sporulation	-	-	-	-
Signal transduction
MEK1	YOR351C	Meiosis-specific serine/threonine protein kinase, functions in meiotic checkpoint, promotes recombination between homologous chromosomes by suppressing double strand break repair between sister chromatids homolog ATR	SMAC_04619	81	NCU09123	Pa_1_9410
TEL1	YBL088C	Protein kinase primarily involved in telomere length regulation; contributes to cell cycle checkpoint control in response to DNA damage; functionally redundant with Mec1p; homolog of human ataxia telangiectasia (ATM) gene	SMAC_01337	4	NCU00274	Pa_7_7600
RIM11	YMR139W	Protein kinase required for signal transduction during entry into meiosis; promotes the formation of the Ime1p-Ume6p complex by phosphorylating Ime1p and Ume6p; shares similarity with mammalian glycogen synthase kinase 3-beta	SMAC_04408	142	NCU04185	Pa_2_10910
RIM15	YFL033C	Glucose-repressible protein kinase involved in signal transduction during cell proliferation in response to nutrients, specifically the establishment of stationary phase; identified as a regulator of IME2; substrate of Pho80p-Pho85p kinase	SMAC_00327	7	NCU07378	Pa_1_17910
GIP1	YBR045C	Meiosis-specific regulatory subunit of the Glc7p protein phosphatase, regulates spore wall formation and septin organization, required for expression of some late meiotic genes and for normal localization of Glc7p	-	-	-	-
IDS2	YJL146W	Protein involved in modulation of Ime2p activity during meiosis, appears to act indirectly to promote Ime2p-mediated late meiotic functions; found in growing cells and degraded during sporulation	-	-	-	-
ALK2	YBL009W	Protein kinase; accumulation and phosphorylation are periodic during the cell cycle; phosphorylated in response to DNA damage; contains characteristic motifs for degradation via the APC pathway; similar to Alk1p and to mammalian haspins	-	-	-	-
MCK1	YNL307C	Protein serine/threonine/tyrosine (dual-specificity) kinase involved in control of chromosome segregation and in regulating entry into meiosis; related to mammalian glycogen synthase kinases of the GSK-3 family	-	-	-	-
